# Supplementary material for: Demographic Control Measure Implications of Tuberculosis Infection for Migrant Workers across Taiwan Regions
Source: MDPI journal article supplement (doi:10.3390/ijerph19169899), 2022-08-11

**Supplementary material: Tables S1 and S2; Figures S1-S3.**

**Table S1** Distribution of migrant workers in different administrative regions in Taiwan

| <b>Administrative regions</b> | <b>Numbers of migrant workers</b> | <b>Proportion <sup>a</sup></b> | <b>Indonesia (N, %) <sup>b</sup></b> | <b>Philippines (N, %)</b> | <b>Thailand (N, %)</b> | <b>Vietnam (N, %)</b> |
|-------------------------------|-----------------------------------|--------------------------------|--------------------------------------|---------------------------|------------------------|-----------------------|
| Taoyuan City                  | 91,898                            | 4.14%                          | 11,935, 13%                          | 30,705, 33%               | 16,998, 19%            | 32,260, 35%           |
| Taichung City                 | 78,423                            | 2.80%                          | 12,031, 15%                          | 15,690, 20%               | 10,215, 13%            | 40,487, 52%           |
| New Taipei City               | 56,041                            | 1.40%                          | 8,853, 16%                           | 9,012, 16%                | 7,753, 14%             | 30,422, 54%           |
| Tainan City                   | 44,240                            | 2.35%                          | 6,128, 14%                           | 13,945, 32%               | 5,335, 12%             | 18,832, 43%           |
| Changhua County               | 43,969                            | 3.44%                          | 8,936, 20%                           | 5,351, 12%                | 6,086, 14%             | 23,596, 54%           |
| Kaohsiung City                | 38,815                            | 1.40%                          | 6,771, 17%                           | 13,508, 35%               | 2,986, 8%              | 15,550, 40%           |
| Hsinchu County                | 22,126                            | 3.97%                          | 1,246, 6%                            | 13,016, 59%               | 1,983, 9%              | 5,881, 27%            |
| Miaoli County                 | 13,573                            | 2.47%                          | 1,854, 14%                           | 5,709, 42%                | 1,730, 13%             | 4,280, 32%            |
| Yunlin County                 | 11,170                            | 1.63%                          | 1,901, 17%                           | 1,456, 13%                | 1,546, 14%             | 6,267, 56%            |
| Hsinchu City                  | 10,488                            | 2.35%                          | 512, 5%                              | 8,036, 77%                | 241, 2%                | 1,699, 16%            |
| Pingtung County               | 7,533                             | 0.91%                          | 2,641, 35%                           | 1,116, 15%                | 419, 6%                | 3,357, 45%            |
| Yilan County                  | 6,875                             | 1.51%                          | 2,101, 31%                           | 1,603, 23%                | 603, 9%                | 2,568, 37%            |
| Nantou County                 | 6,722                             | 1.35%                          | 1,187, 18%                           | 787, 12%                  | 1,562, 23%             | 3,186, 47%            |
| Chiayi County                 | 6,545                             | 1.29%                          | 1,254, 19%                           | 1,317, 20%                | 1,041, 16%             | 2,933, 45%            |
| Taipei City                   | 2,574                             | 0.10%                          | 501, 19%                             | 135, 5%                   | 785, 31%               | 1,153, 45%            |
| Penghu County                 | 2,307                             | 2.21%                          | 1,921, 83%                           | 258, 11%                  | 0, 0%                  | 128, 6%               |
| Keelung City                  | 2,104                             | 0.57%                          | 692, 33%                             | 429, 20%                  | 240, 11%               | 743, 35%              |
| Hualien County                | 1,869                             | 0.57%                          | 438, 23%                             | 463, 25%                  | 617, 33%               | 351, 19%              |
| Chiayi City                   | 732                               | 0.27%                          | 214, 29%                             | 134, 18%                  | 44, 6%                 | 340, 46%              |
| Taitung County                | 472                               | 0.22%                          | 271, 57%                             | 32, 7%                    | 0, 0%                  | 169, 36%              |
| Kinmen County                 | 217                               | 0.16%                          | 32, 15%                              | 0, 0%                     | 101, 47%               | 84, 39%               |
| Lienchiang County             | 60                                | 0.46%                          | 27, 45%                              | 11, 18%                   | 0, 0%                  | 22, 37%               |

<sup>a</sup> The proportion is defined as the number of migrant workers to total population size (migrant add local population) in specific administrative regions.

<sup>b</sup> N and % indicated population size and percentage in specific administrative regions.

**Table S2** Percentage of reduction in total number of latently infected ( $L$ ) + infectious ( $T$ ) individuals under different single, dual, and triple combinations control strategies in Taoyuan, Taichung, and New Taipei Cities in 2020 (two years projection) and 2023 (five years projection)

| Projection                                      | City            | Single control strategies         |       |                          |       |                          |       |                                          |       |       |
|-------------------------------------------------|-----------------|-----------------------------------|-------|--------------------------|-------|--------------------------|-------|------------------------------------------|-------|-------|
|                                                 |                 | Social distance control ( $u_1$ ) |       |                          |       |                          |       |                                          |       |       |
|                                                 |                 | 10%                               | 20%   | 30%                      | 40%   | 50%                      | 60%   | 70%                                      | 80%   | 90%   |
| 2-yr                                            | Taoyuan City    | 5.8%                              | 11.3% | 16.4%                    | 21.3% | 25.9%                    | 30.3% | 34.4%                                    | 38.3% | 42.1% |
|                                                 | Taichung City   | 7.3%                              | 14.1% | 20.4%                    | 26.3% | 31.9%                    | 37.0% | 41.9%                                    | 46.4% | 50.7% |
|                                                 | New Taipei City | 10.9%                             | 20.7% | 29.5%                    | 37.5% | 44.7%                    | 51.2% | 57.2%                                    | 62.6% | 67.6% |
| 5-yr                                            | Taoyuan City    | 18.1%                             | 31.8% | 42.4%                    | 51.0% | 58.1%                    | 64.0% | 68.9%                                    | 73.1% | 76.7% |
|                                                 | Taichung City   | 24.2%                             | 40.5% | 52.2%                    | 61.0% | 68.0%                    | 73.5% | 78.0%                                    | 81.6% | 84.7% |
|                                                 | New Taipei City | 52.7%                             | 72.2% | 81.4%                    | 86.8% | 90.4%                    | 92.8% | 94.6%                                    | 96.0% | 97.0% |
|                                                 |                 | Early screening control ( $u_2$ ) |       |                          |       |                          |       |                                          |       |       |
|                                                 |                 | 10%                               | 20%   | 30%                      | 40%   | 50%                      | 60%   | 70%                                      | 80%   | 90%   |
| 2-yr                                            | Taoyuan City    | 3.8%                              | 7.6%  | 11.3%                    | 14.9% | 18.4%                    | 21.8% | 25.2%                                    | 28.5% | 31.7% |
|                                                 | Taichung City   | 4.6%                              | 9.1%  | 13.5%                    | 17.7% | 21.8%                    | 25.9% | 29.7%                                    | 33.5% | 37.2% |
|                                                 | New Taipei City | 6.2%                              | 12.1% | 17.8%                    | 23.3% | 28.5%                    | 33.5% | 38.2%                                    | 42.8% | 47.1% |
| 5-yr                                            | Taoyuan City    | 12.2%                             | 22.9% | 32.4%                    | 40.8% | 48.2%                    | 54.8% | 60.6%                                    | 65.8% | 70.5% |
|                                                 | Taichung City   | 16.2%                             | 29.5% | 40.7%                    | 50.0% | 57.9%                    | 64.6% | 70.2%                                    | 75.0% | 79.2% |
|                                                 | New Taipei City | 32.5%                             | 54.9% | 68.7%                    | 77.4% | 83.4%                    | 87.6% | 90.6%                                    | 92.9% | 94.7% |
|                                                 |                 | DOTS control ( $u_3$ )            |       |                          |       |                          |       |                                          |       |       |
|                                                 |                 | 80%                               | 85%   | 90%                      | 95%   |                          |       |                                          |       |       |
| 2-yr                                            | Taoyuan City    | 13.3%                             | 13.9% | 14.5%                    | 15.1% |                          |       |                                          |       |       |
|                                                 | Taichung City   | 16.7%                             | 17.5% | 18.2%                    | 18.9% |                          |       |                                          |       |       |
|                                                 | New Taipei City | 22.7%                             | 23.8% | 24.8%                    | 25.7% |                          |       |                                          |       |       |
| 5-yr                                            | Taoyuan City    | 40.9%                             | 42.3% | 43.5%                    | 44.7% |                          |       |                                          |       |       |
|                                                 | Taichung City   | 50.3%                             | 51.7% | 53.0%                    | 54.3% |                          |       |                                          |       |       |
|                                                 | New Taipei City | 77.3%                             | 78.4% | 79.5%                    | 80.5% |                          |       |                                          |       |       |
| Dual and triple combinations control strategies |                 |                                   |       |                          |       |                          |       |                                          |       |       |
|                                                 |                 | $u_1$ (70%)+ $u_2$ (70%)          |       | $u_1$ (70%)+ $u_3$ (85%) |       | $u_2$ (70%)+ $u_3$ (85%) |       | $u_1$ (70%)+<br>$u_2$ (70%)+ $u_3$ (85%) |       |       |
| 2-yr                                            | Taoyuan City    | 39%                               |       | 38%                      |       | 31%                      |       | 41%                                      |       |       |
|                                                 | Taichung City   | 47%                               |       | 46%                      |       | 37%                      |       | 49%                                      |       |       |
|                                                 | New Taipei City | 63%                               |       | 62%                      |       | 49%                      |       | 66%                                      |       |       |
| 5-yr                                            | Taoyuan City    | 74%                               |       | 73%                      |       | 68%                      |       | 76%                                      |       |       |
|                                                 | Taichung City   | 83%                               |       | 82%                      |       | 77%                      |       | 84%                                      |       |       |
|                                                 | New Taipei City | 96%                               |       | 96%                      |       | 94%                      |       | 97%                                      |       |       |

**Figure S1** Sensitivity Analysis of four transmission rates ( $\beta_M$ ,  $\beta_L$ ,  $\beta_{LM}$ ,  $\beta_{ML}$ ) and reactivation rate ( $k$ ) in Taoyuan City.

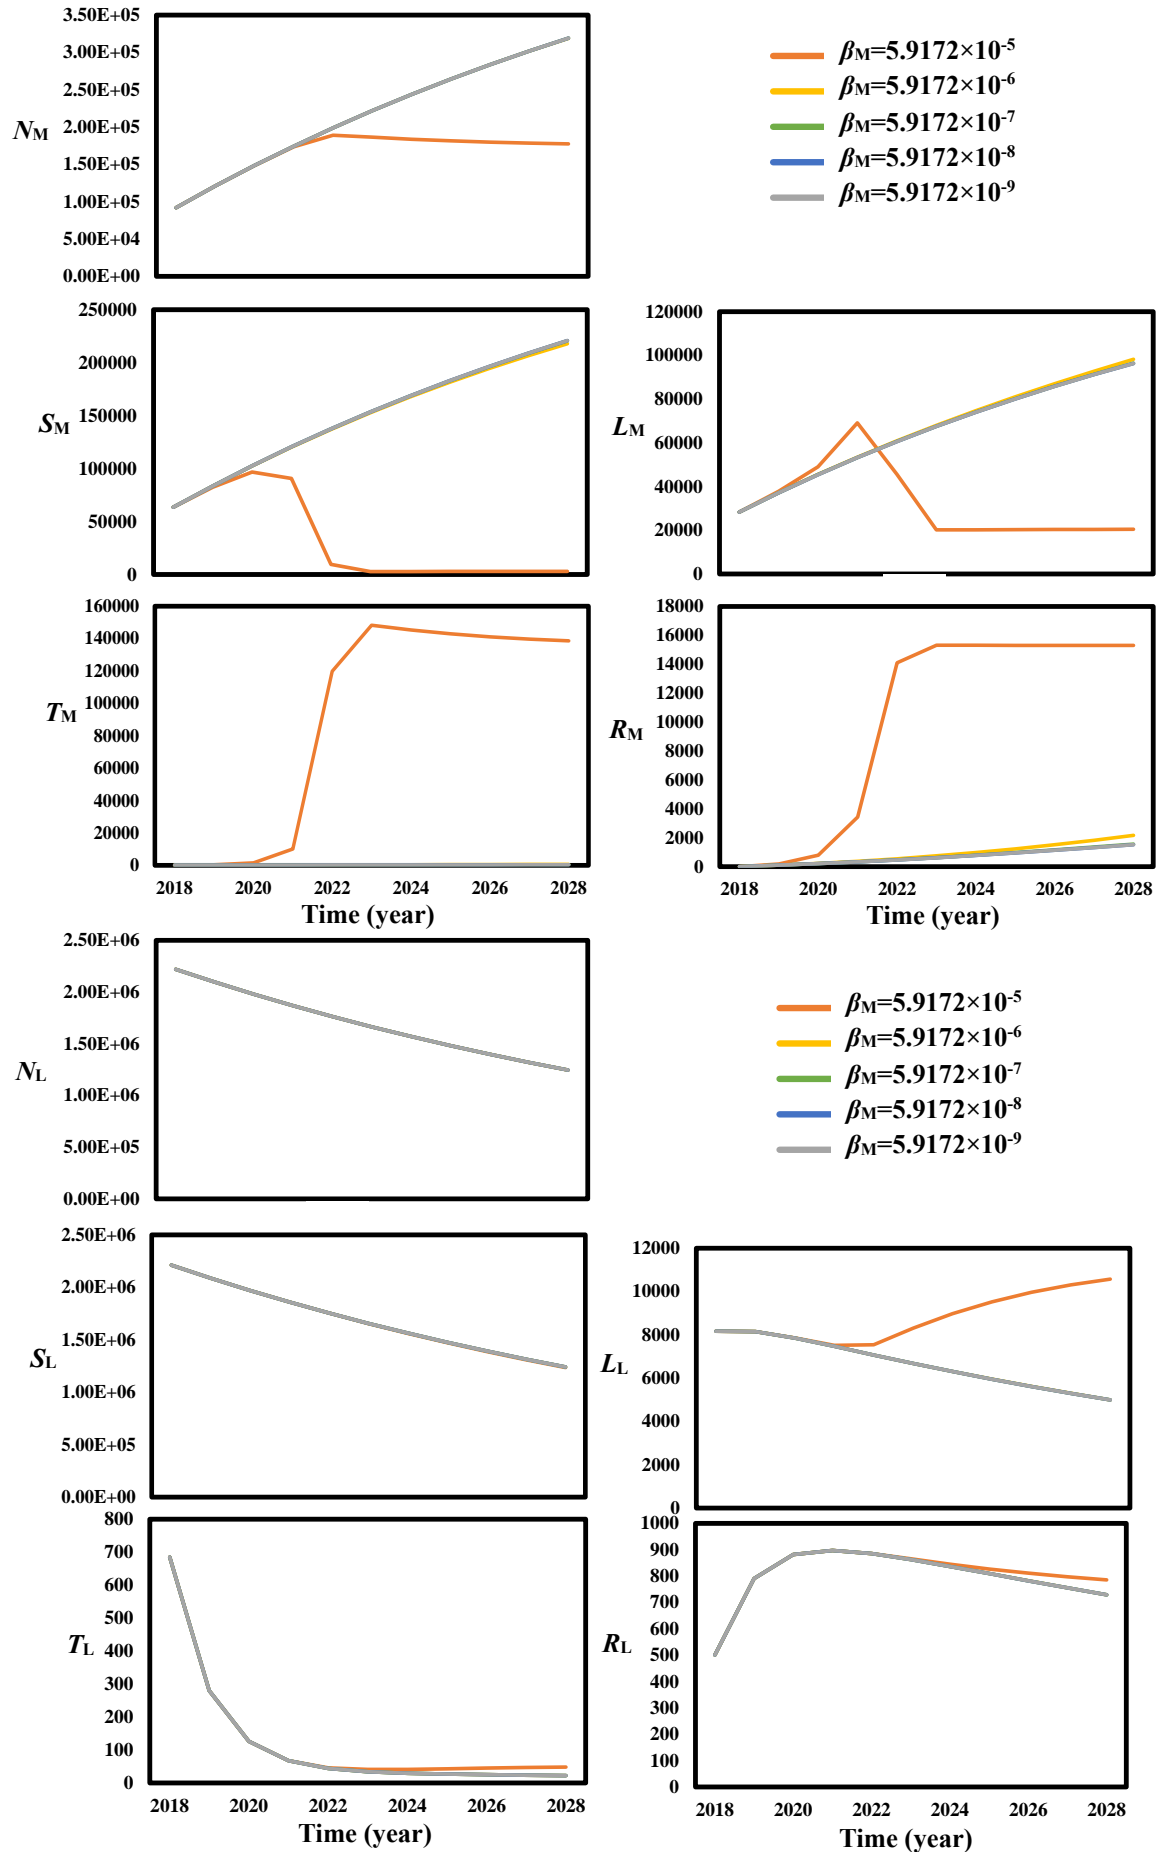

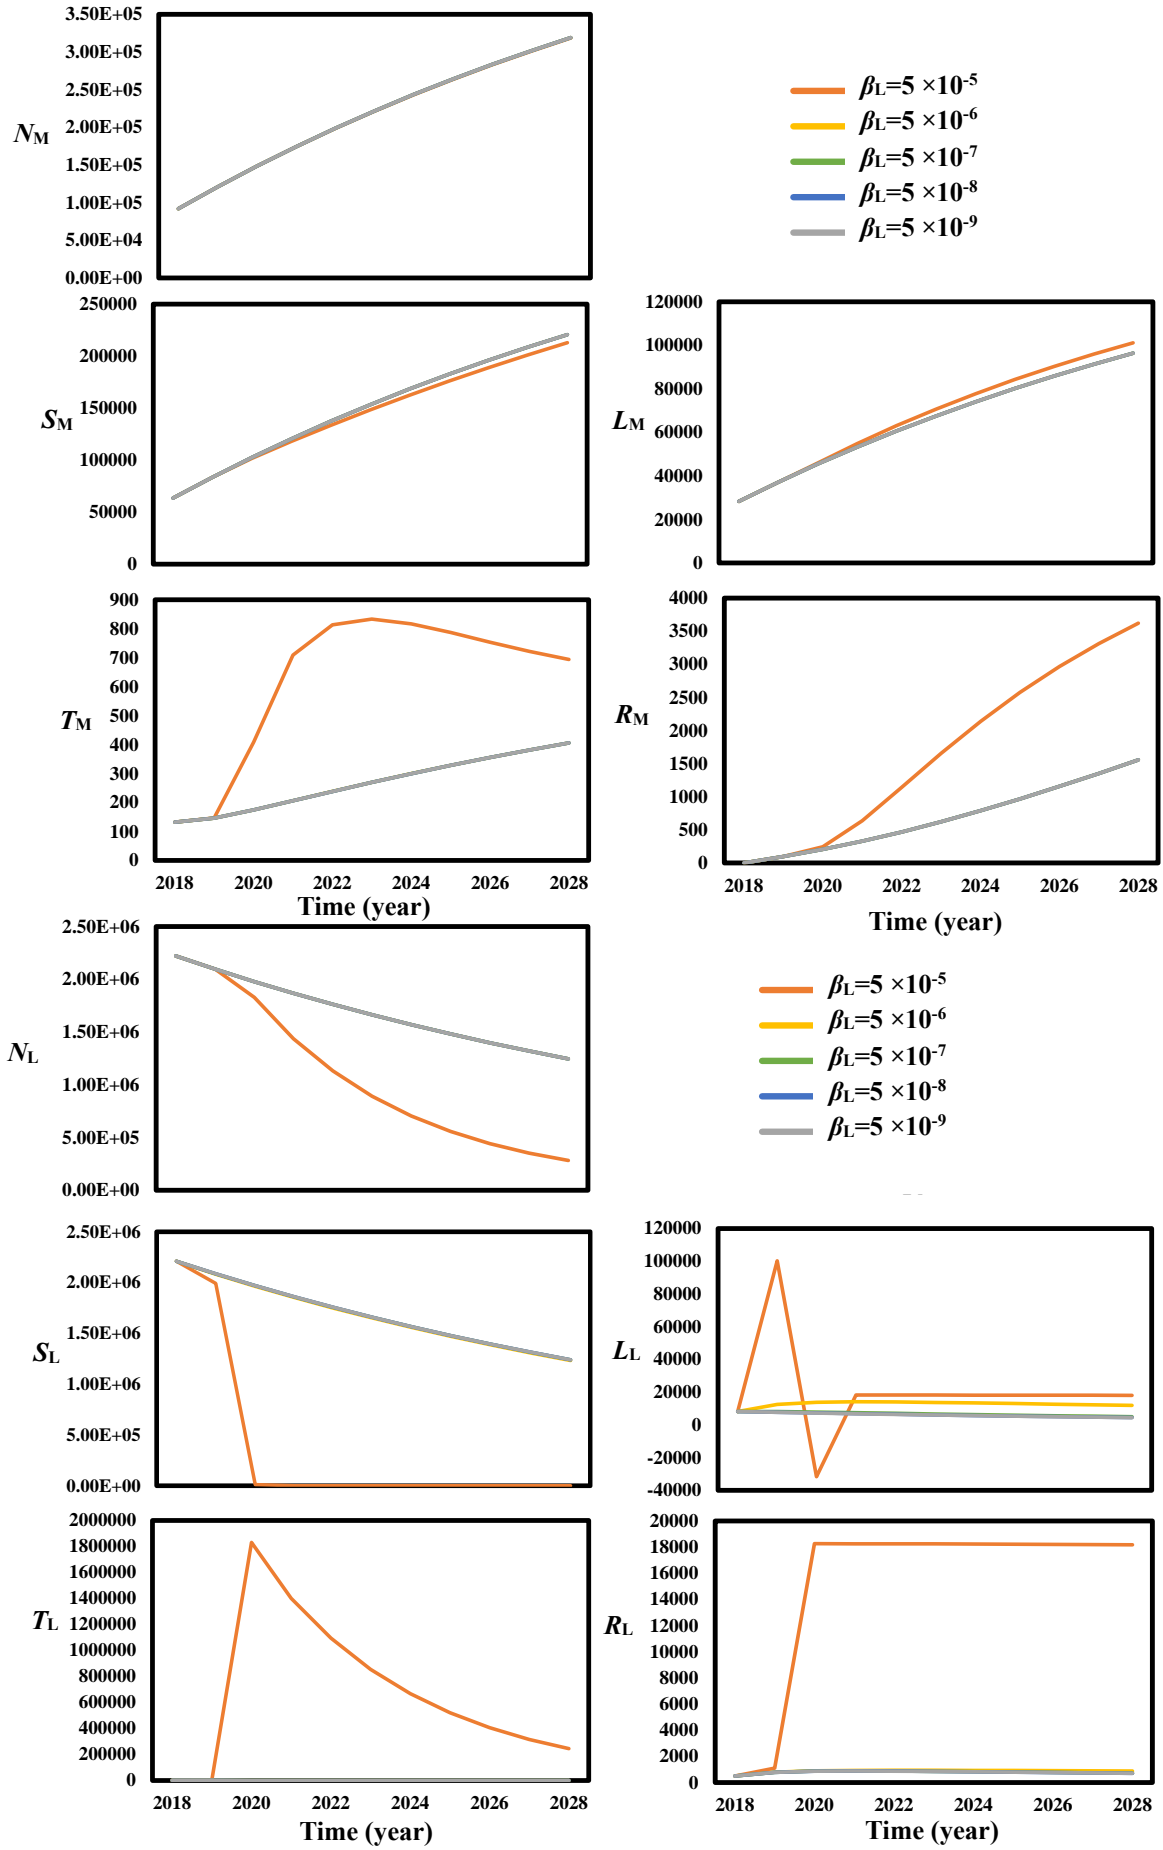

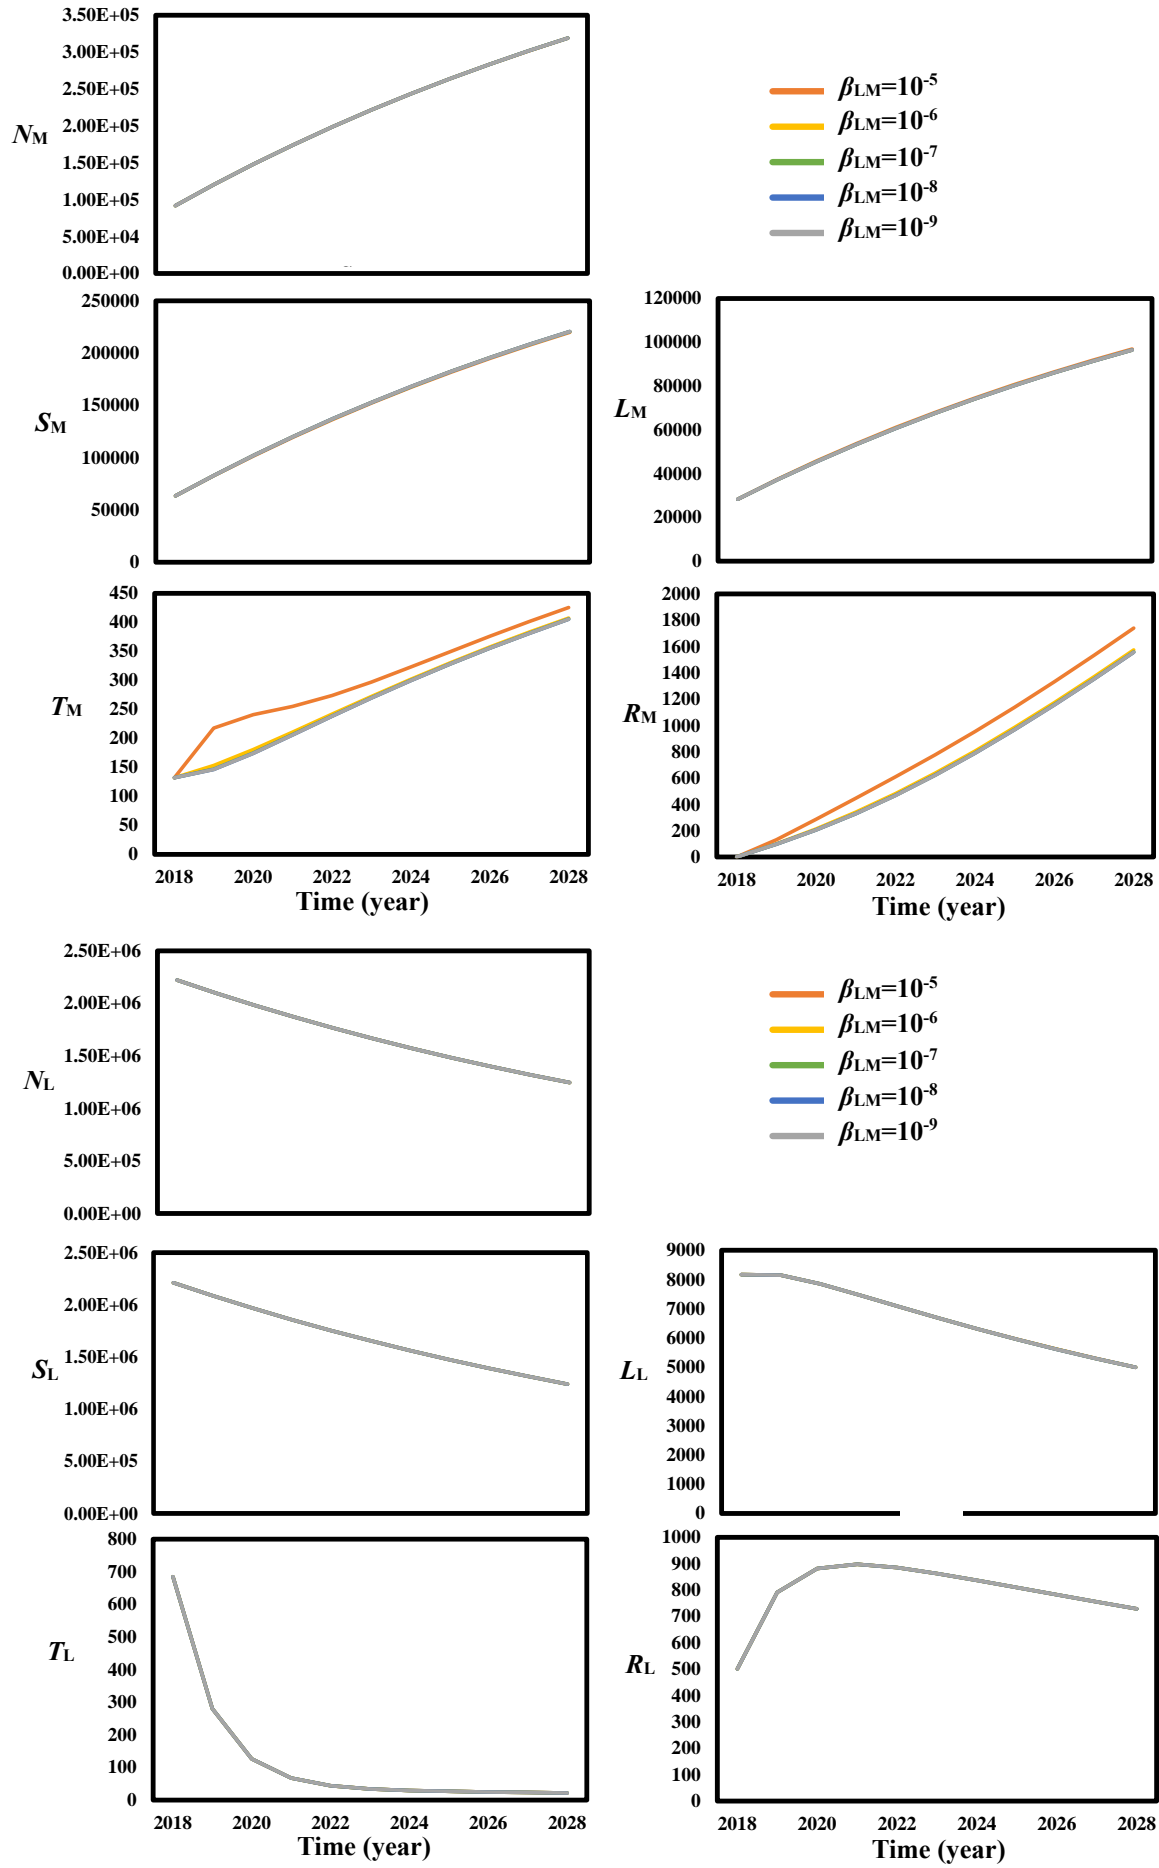

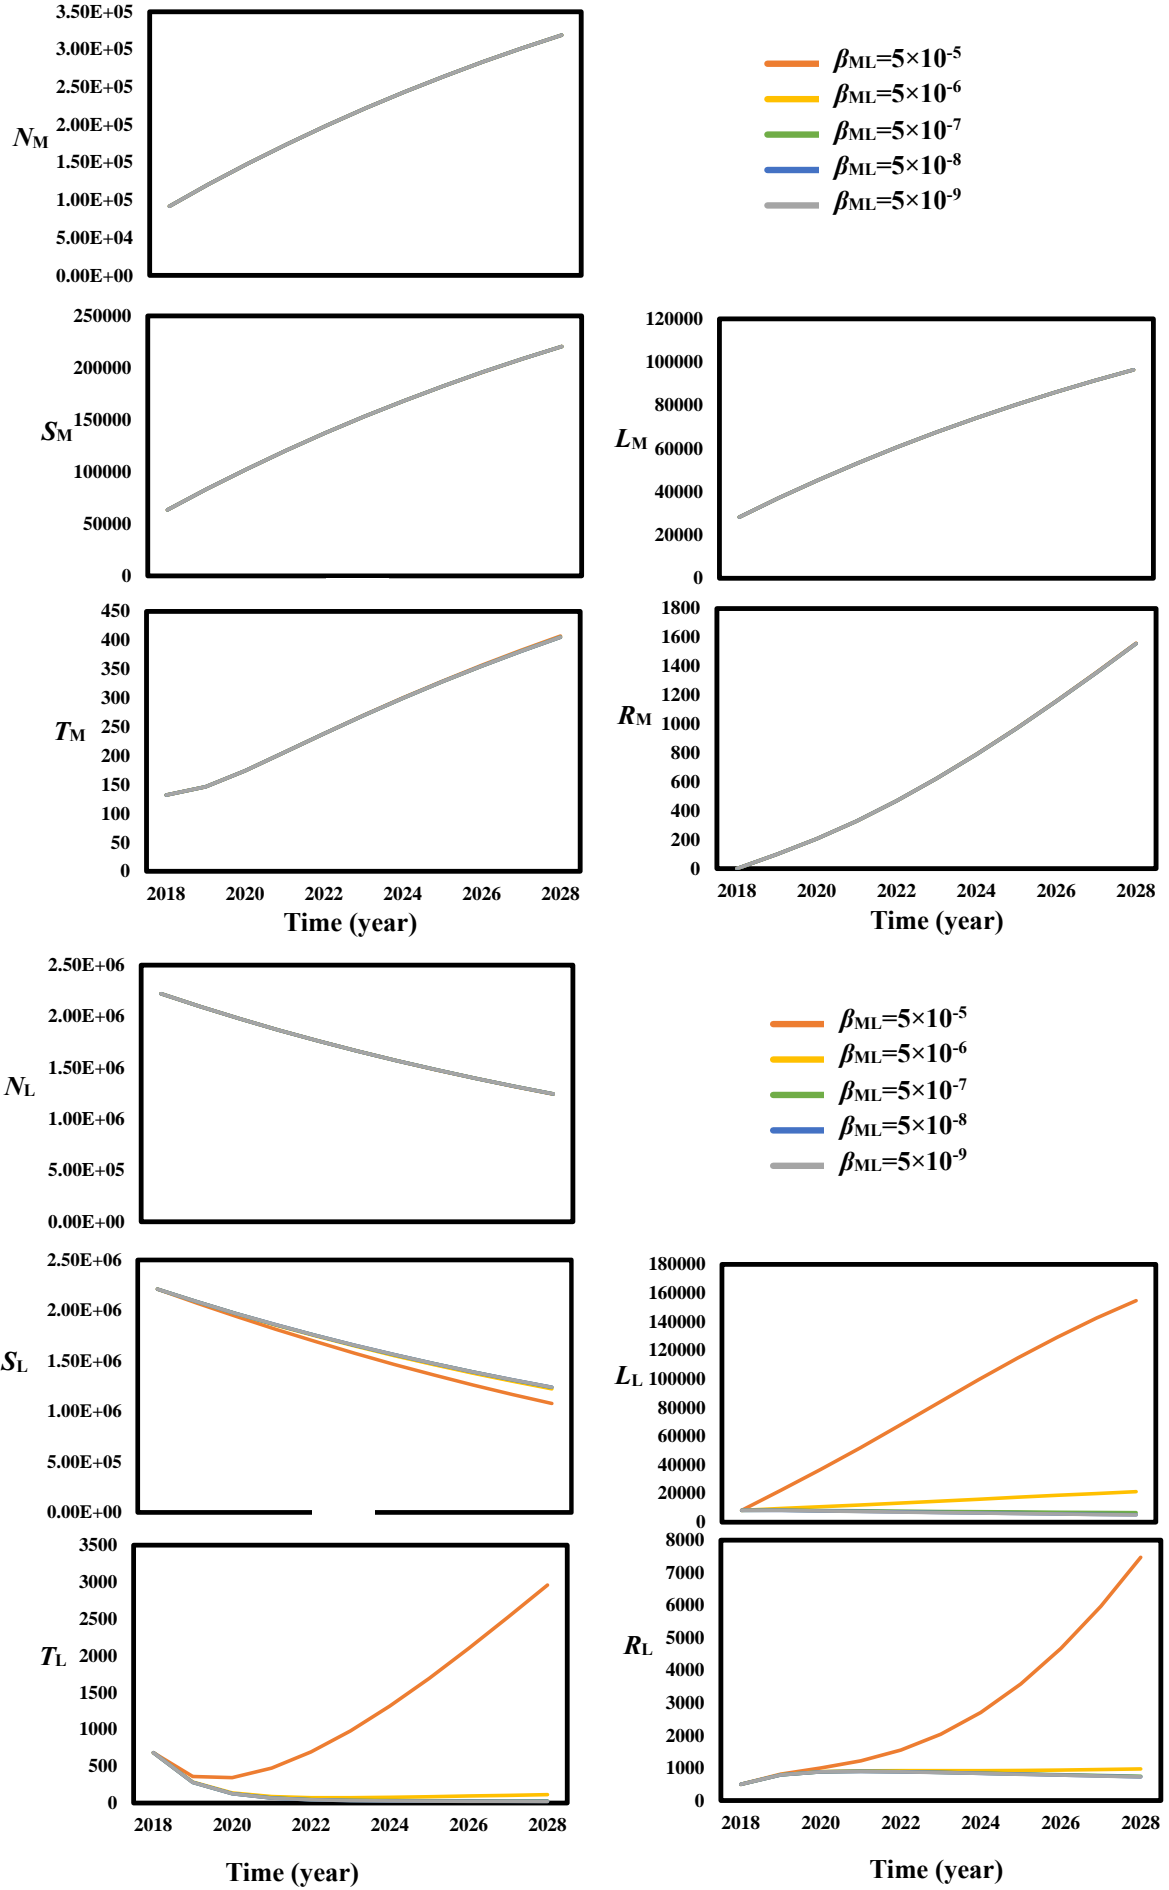

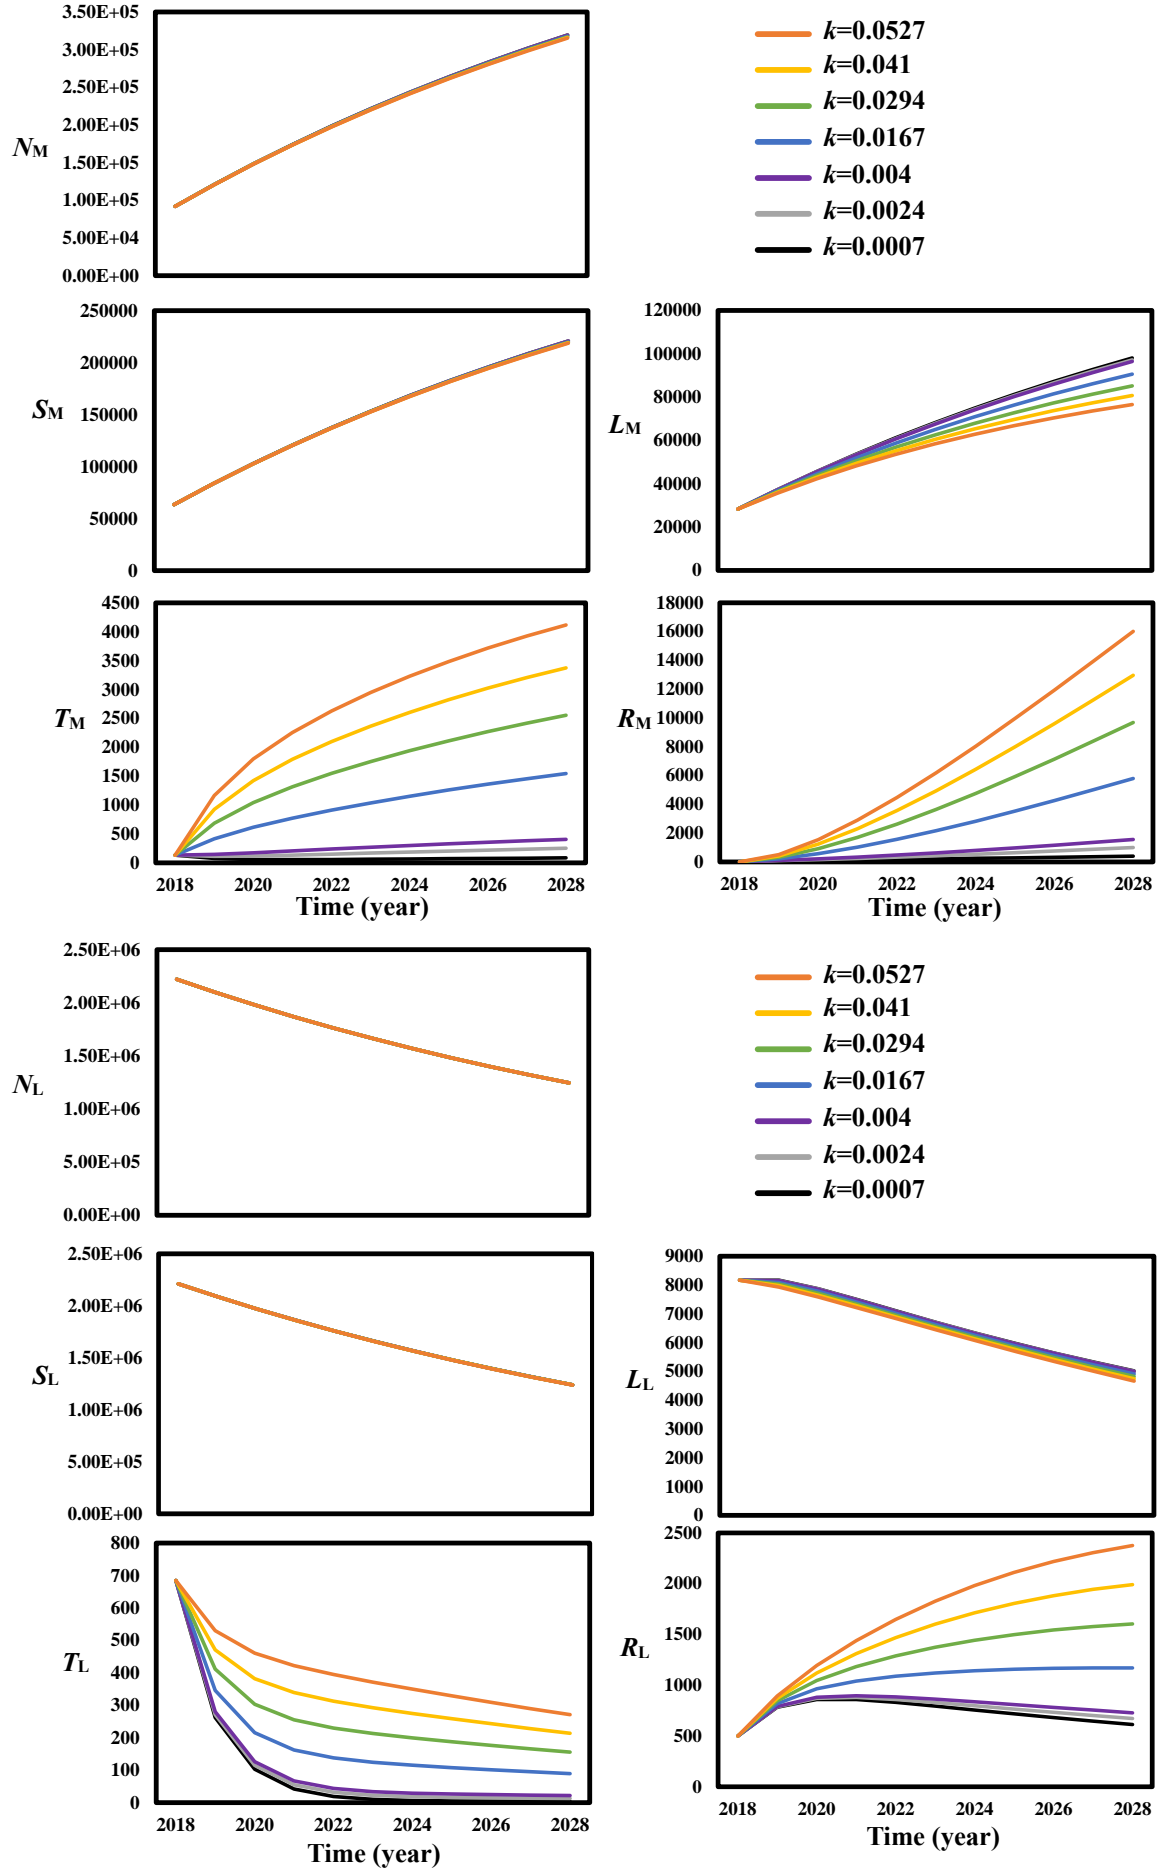

**Figure S2** Sensitivity Analysis of four transmission rates ( $\beta_M$ ,  $\beta_L$ ,  $\beta_{LM}$ ,  $\beta_{ML}$ ) and reactivation rate ( $k$ ) in Taichung City.

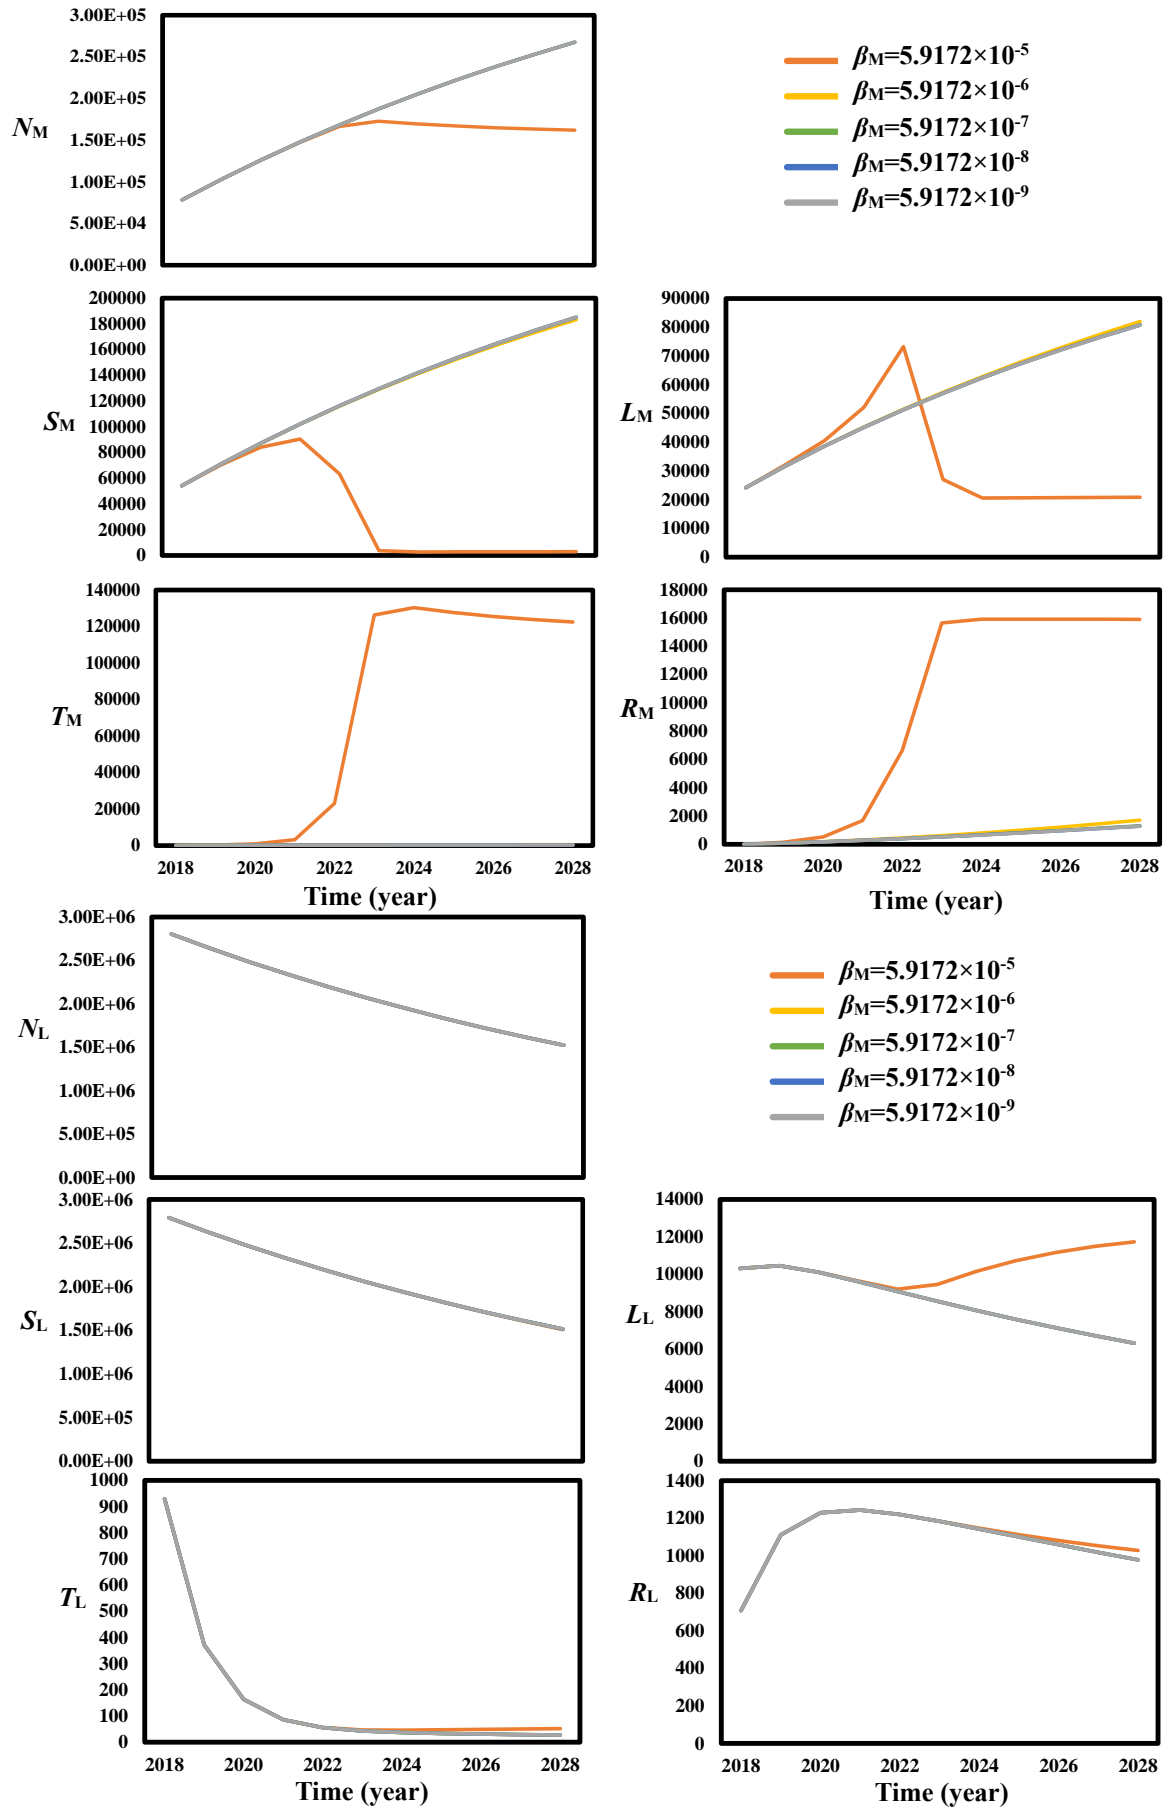



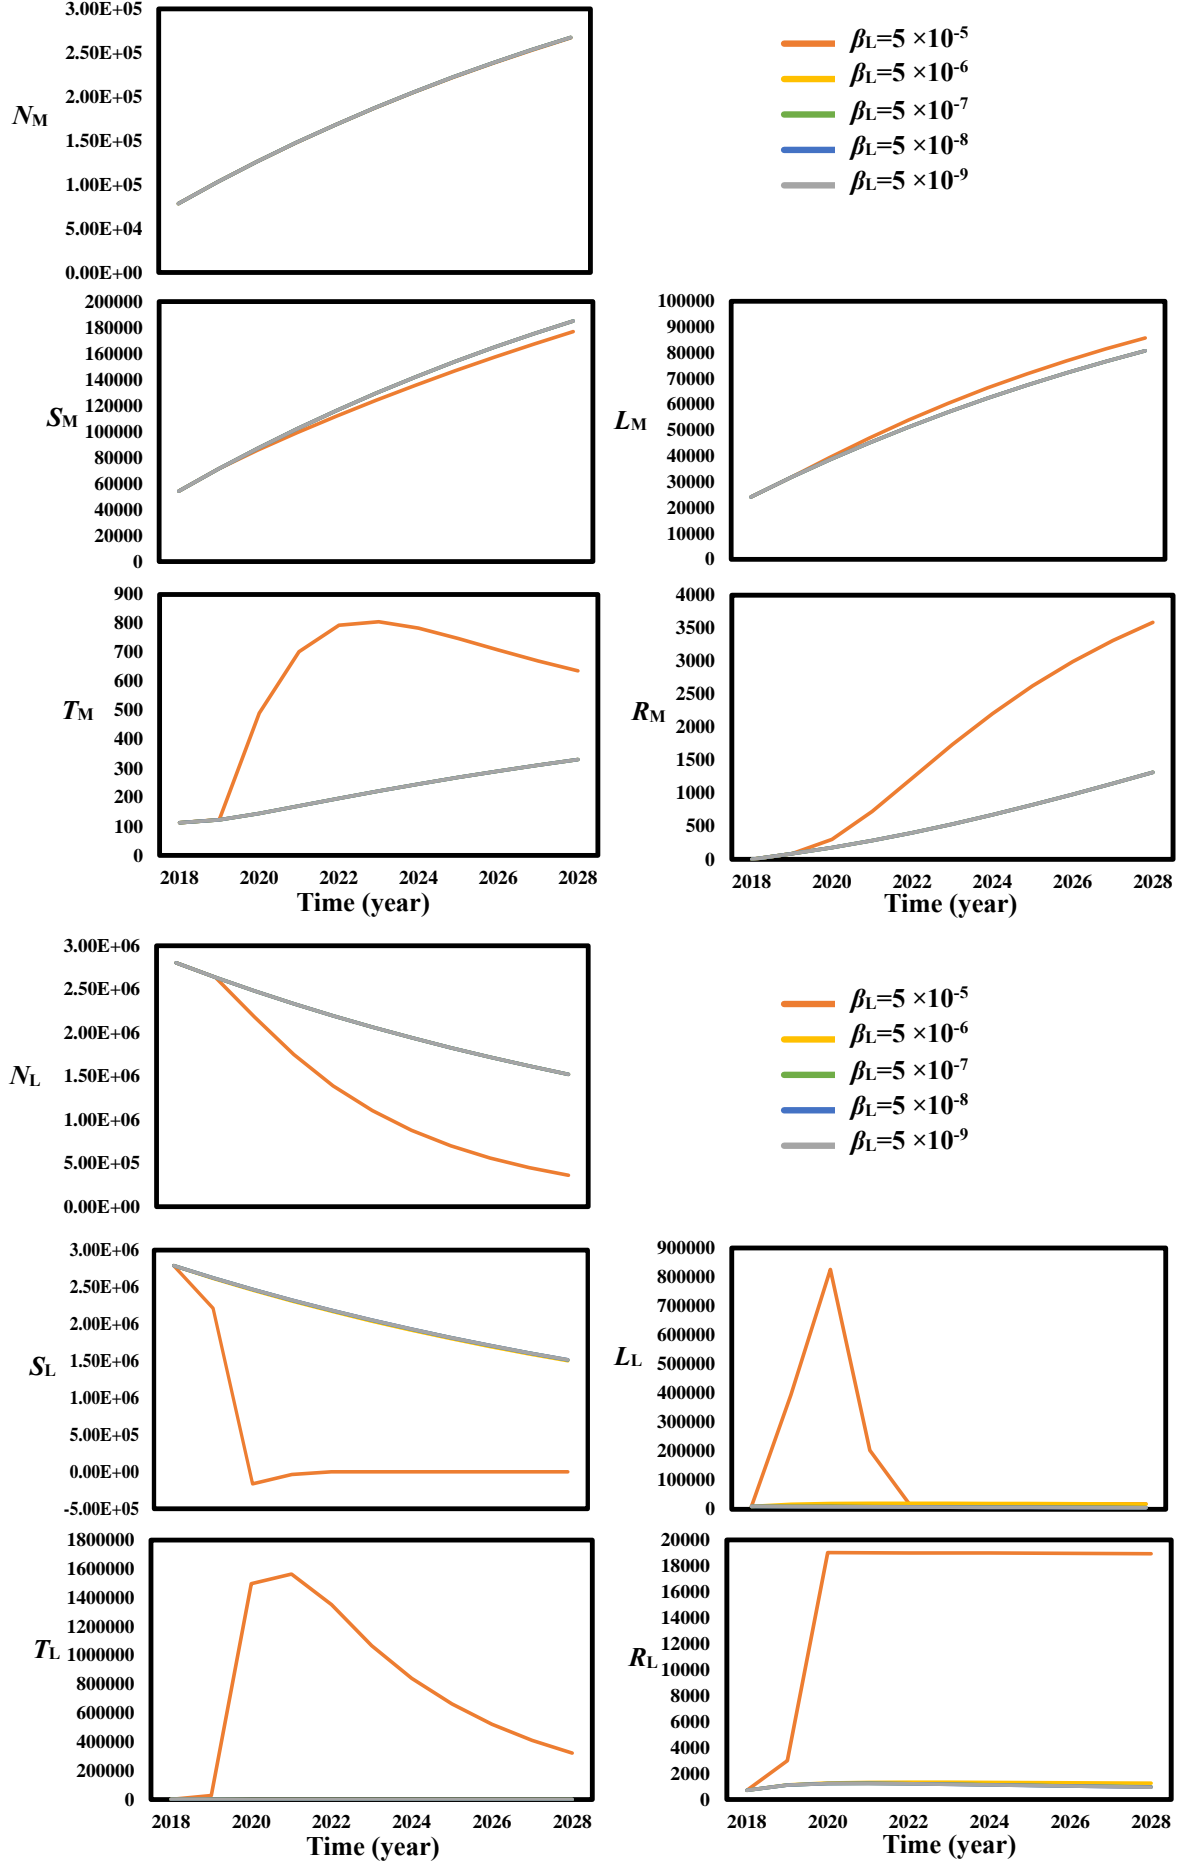

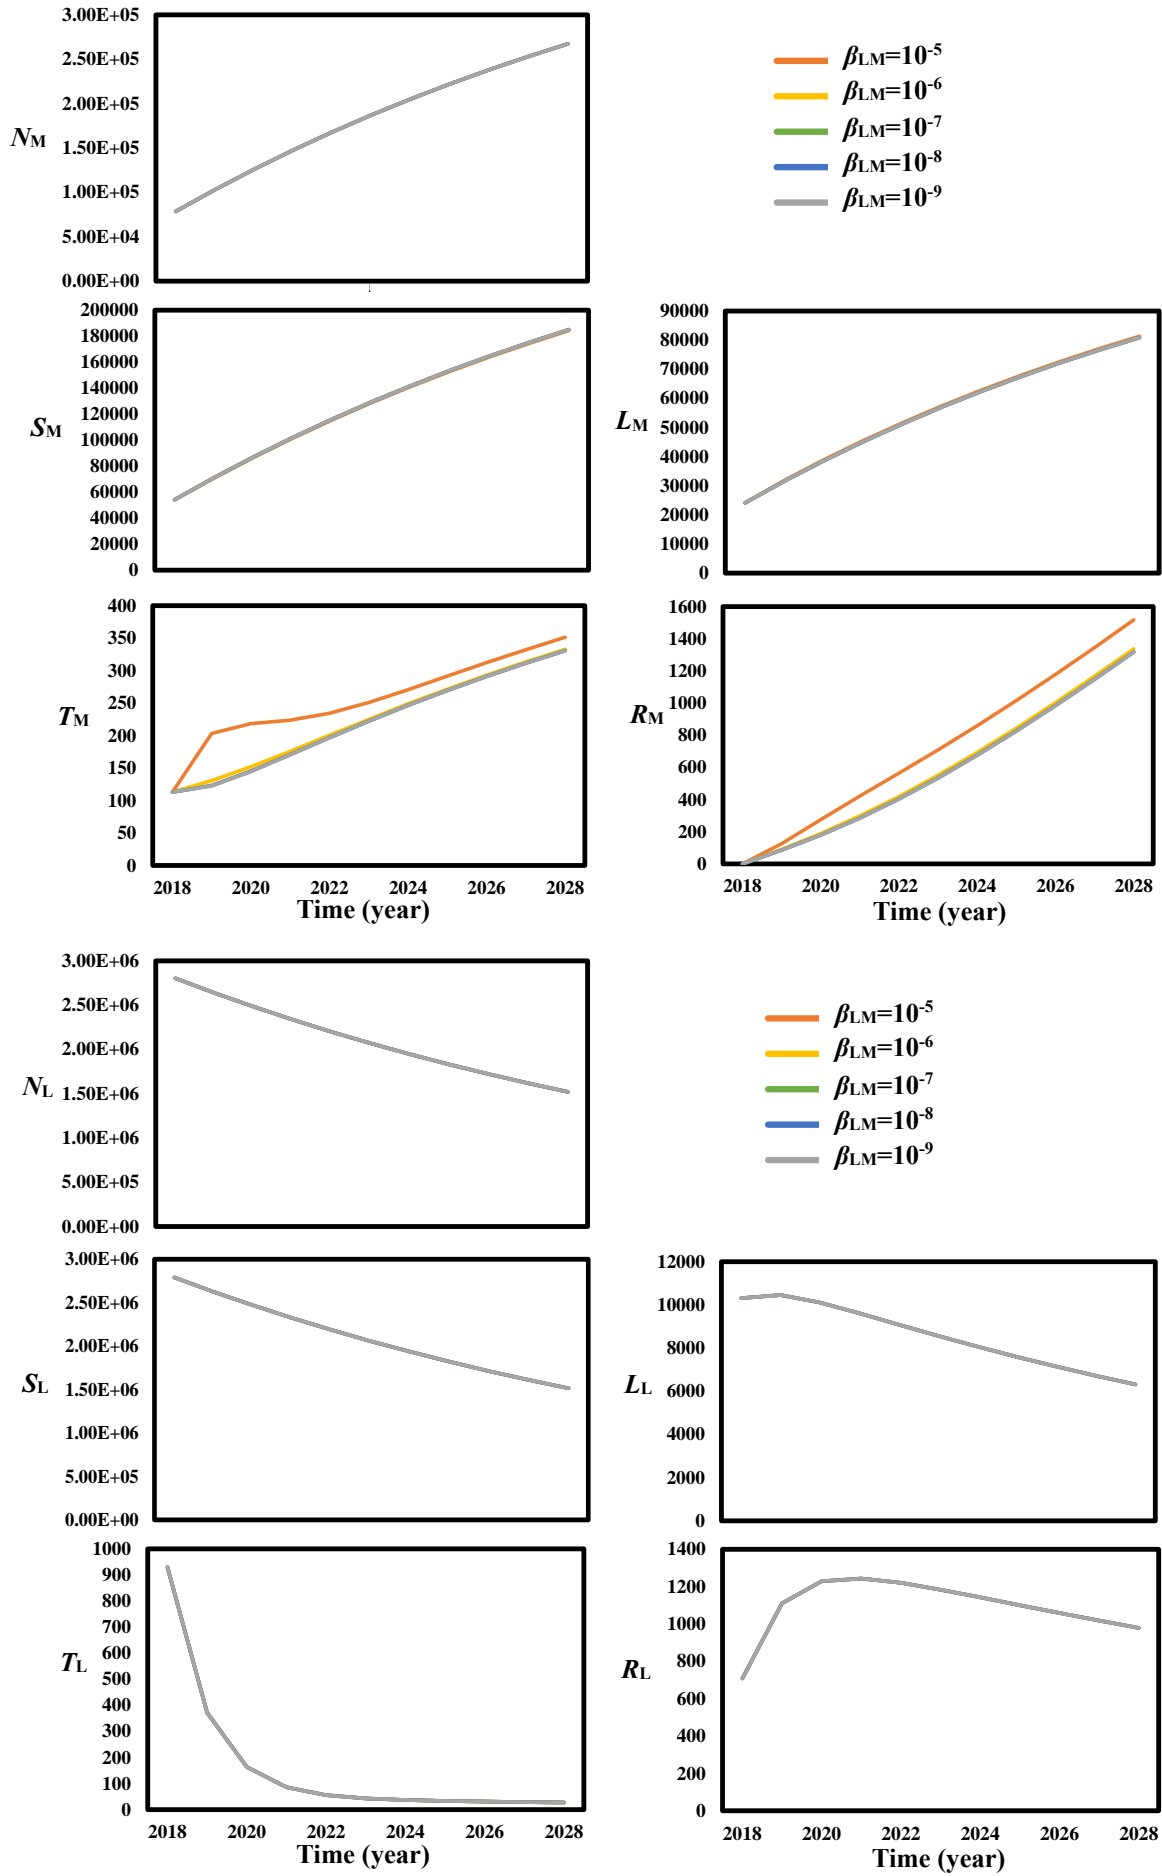

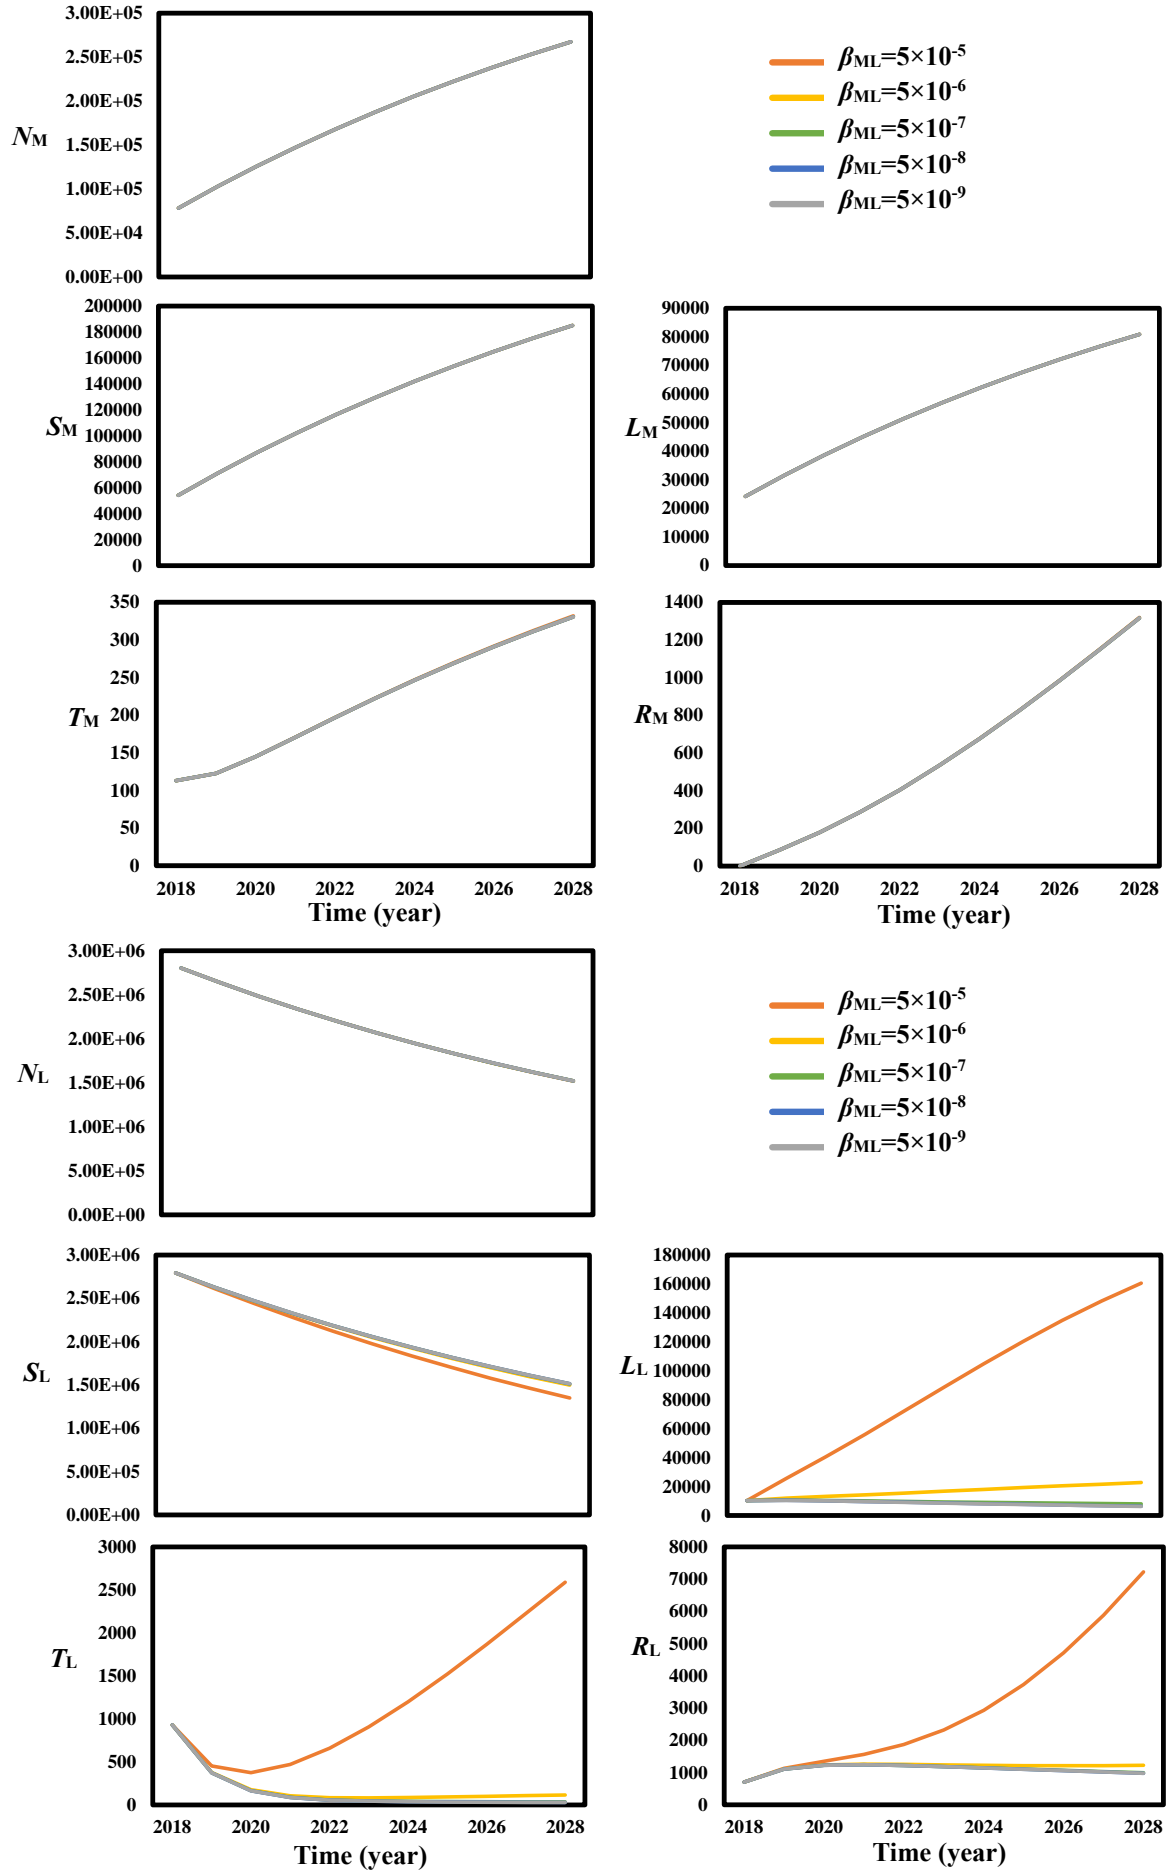

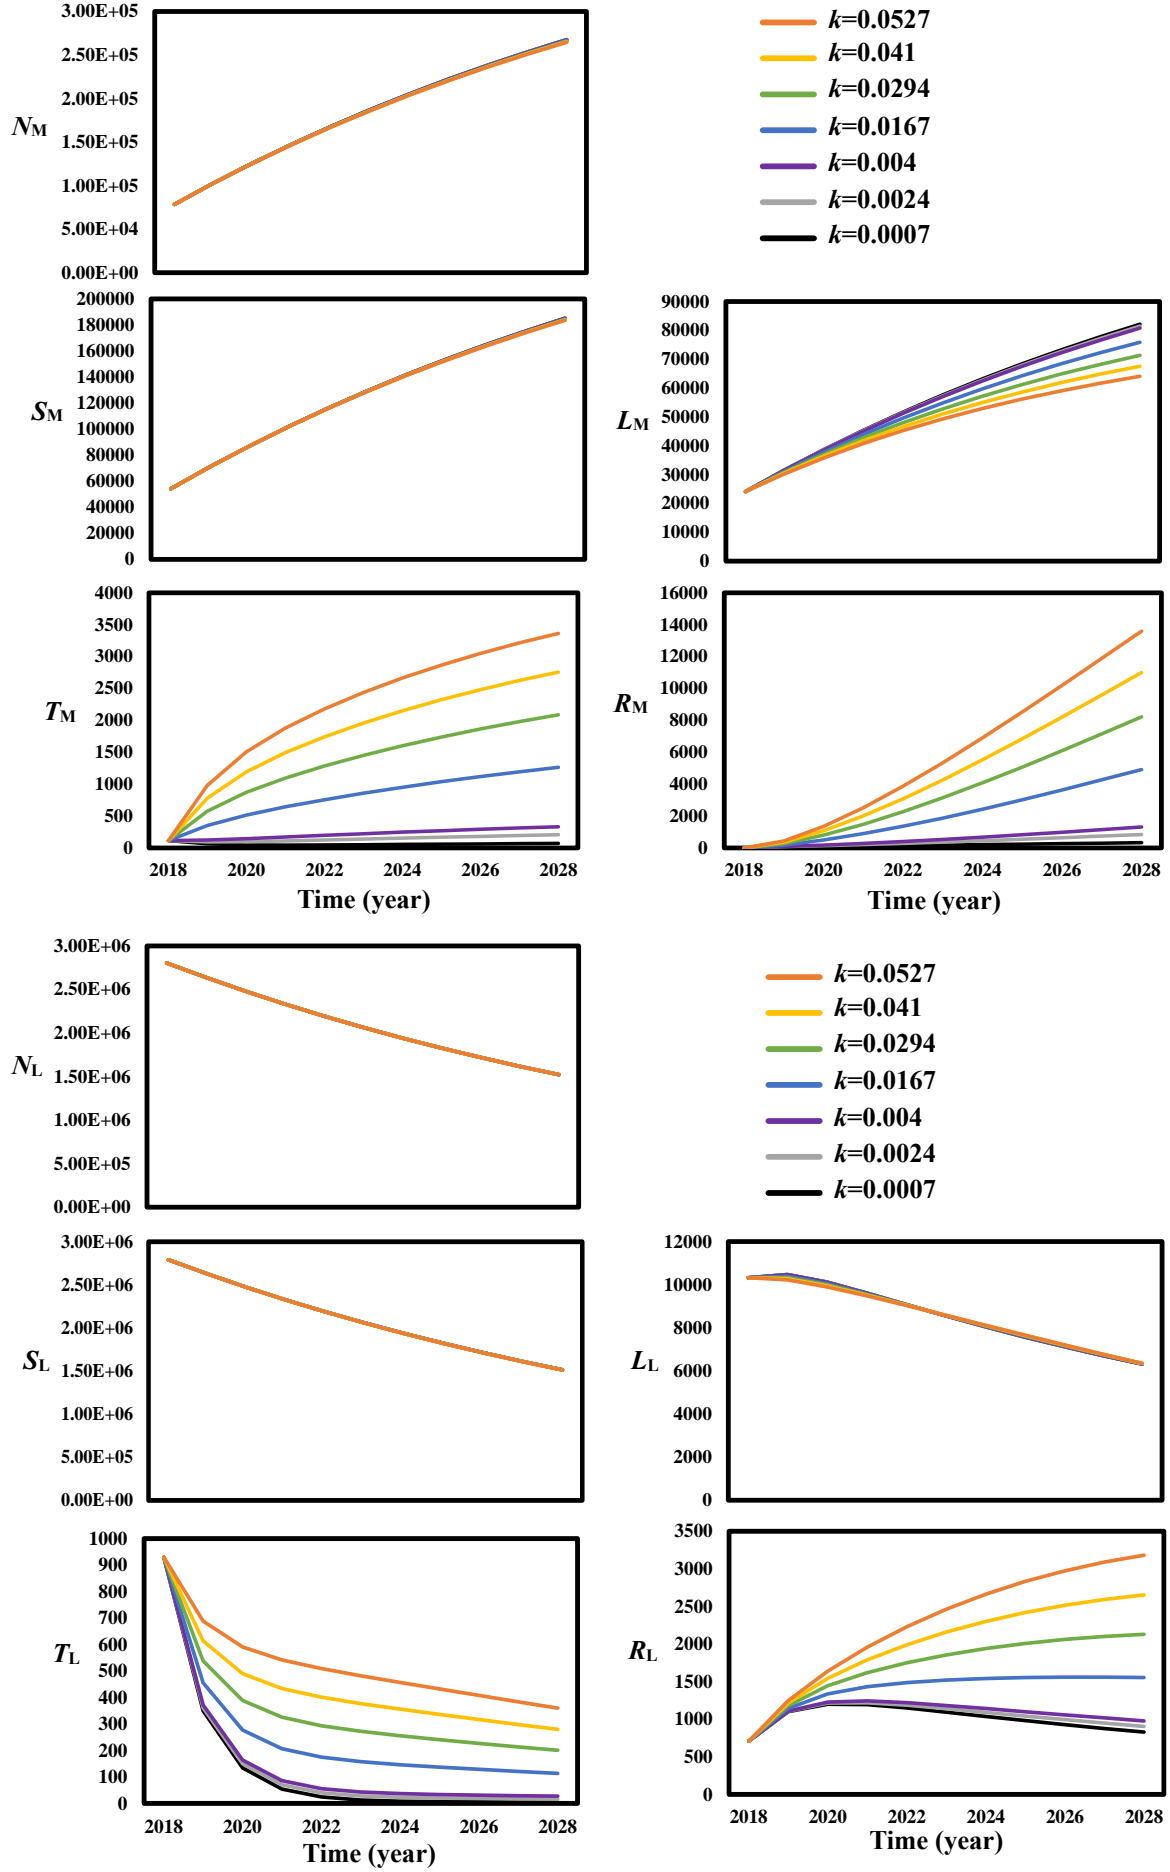

**Figure S3** Sensitivity Analysis of four transmission rates ( $\beta_M$ ,  $\beta_L$ ,  $\beta_{LM}$ ,  $\beta_{ML}$ ) and reactivation rate ( $k$ ) in New Taipei City.

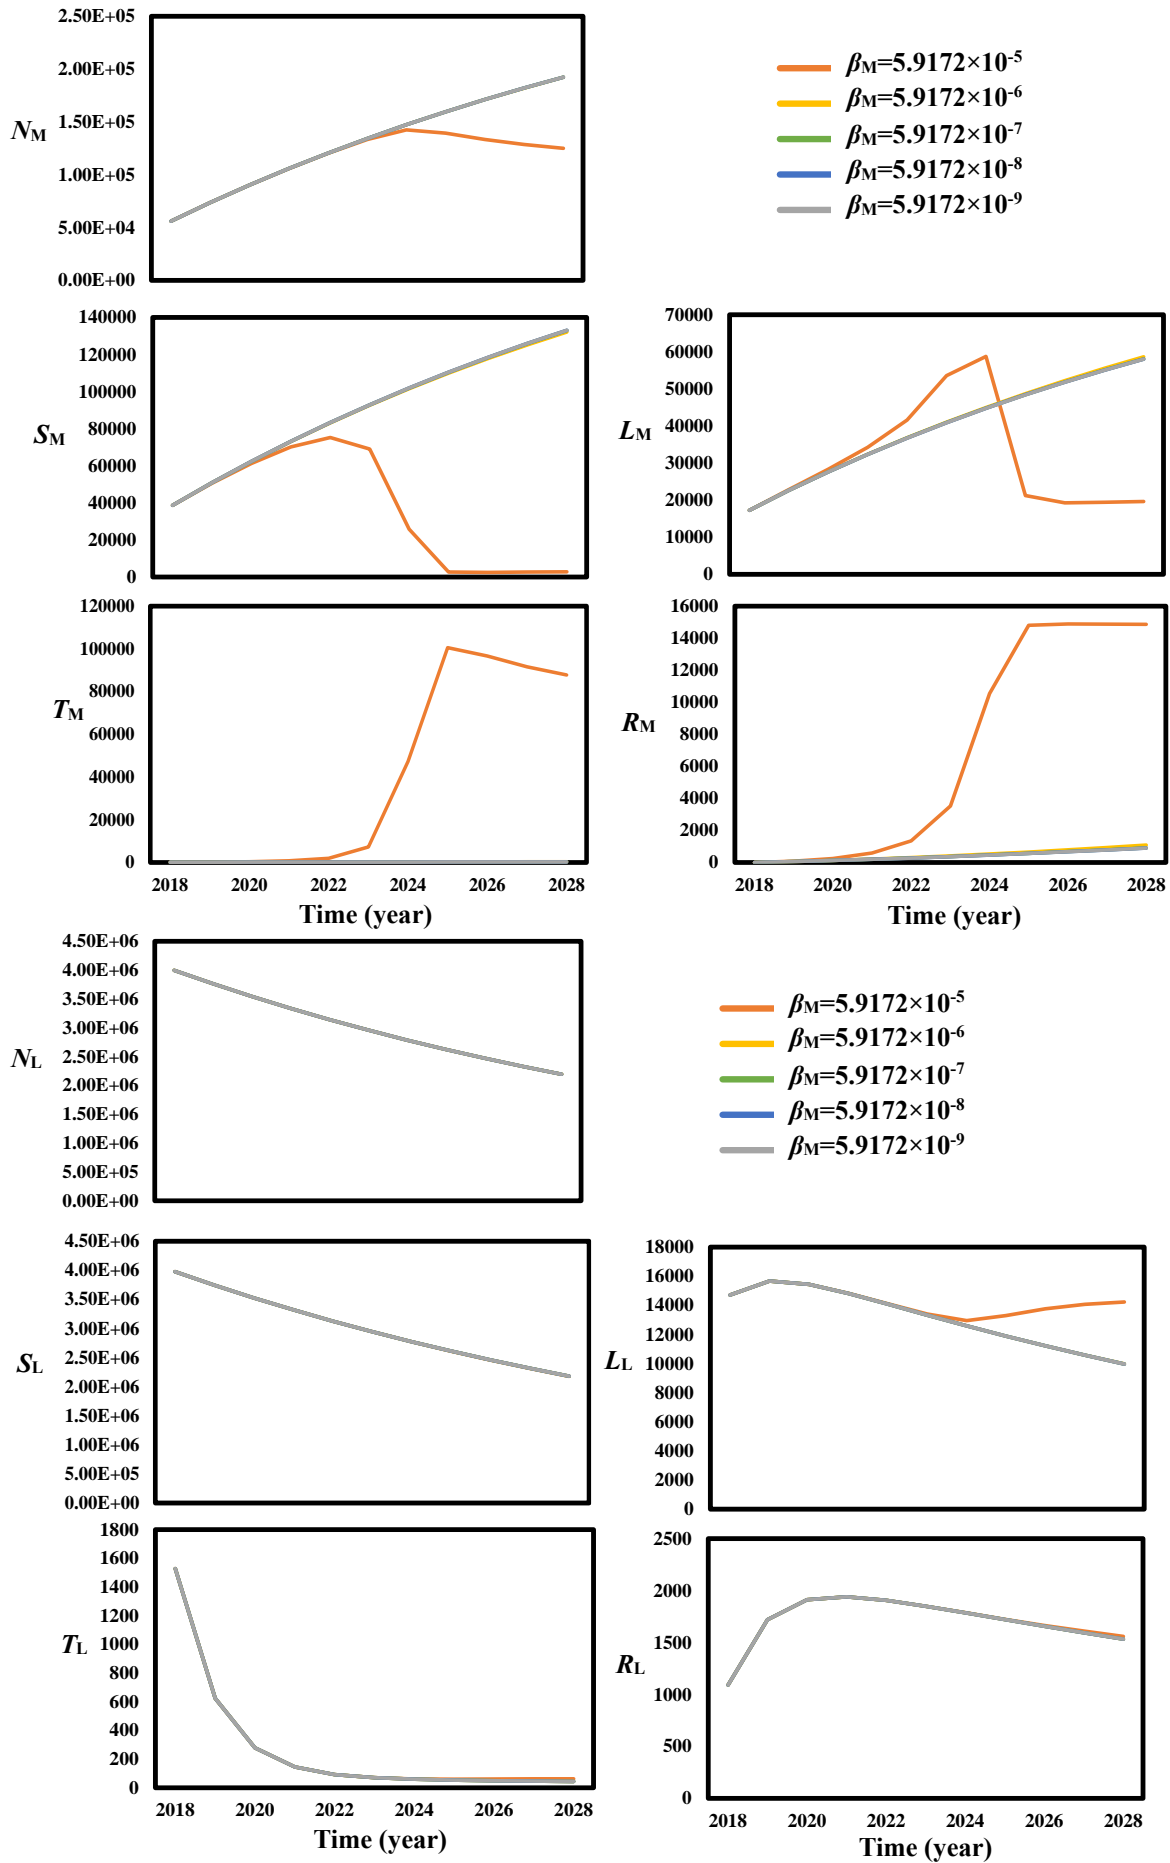

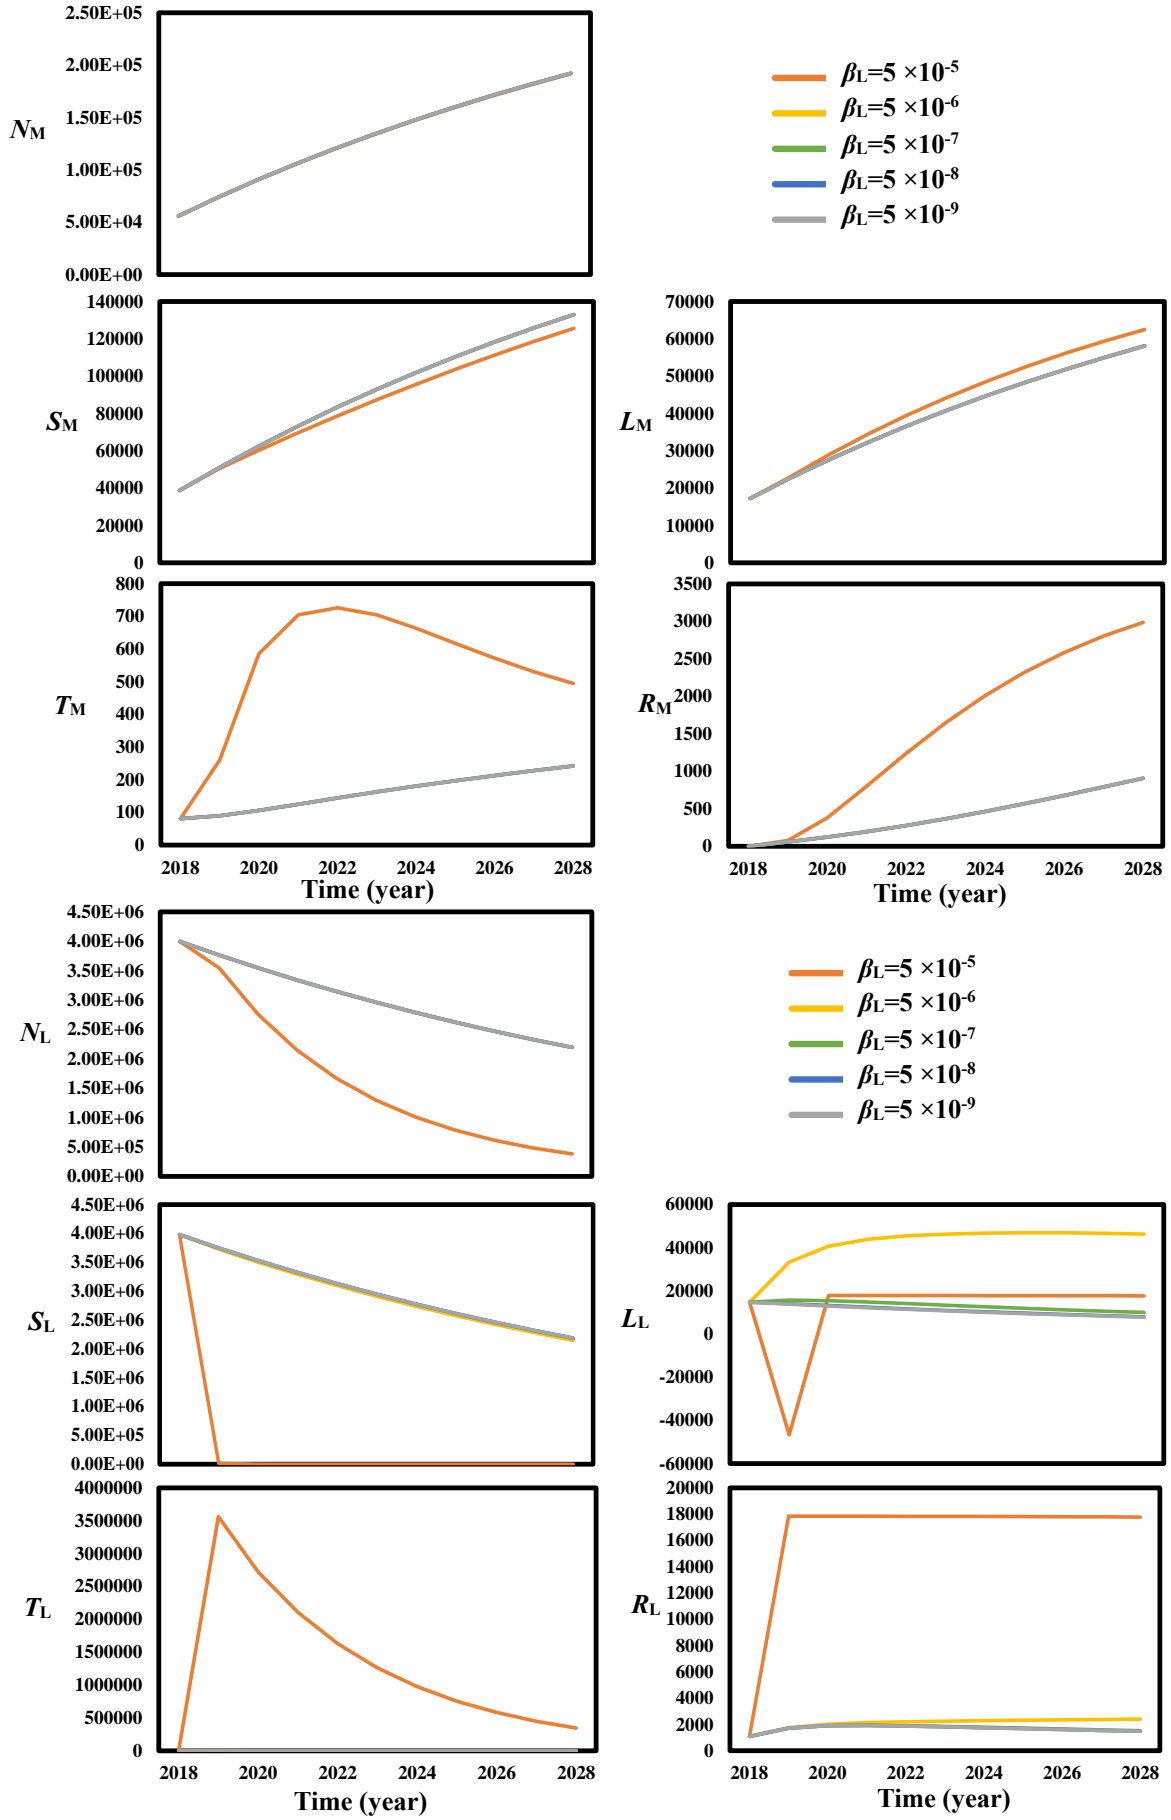

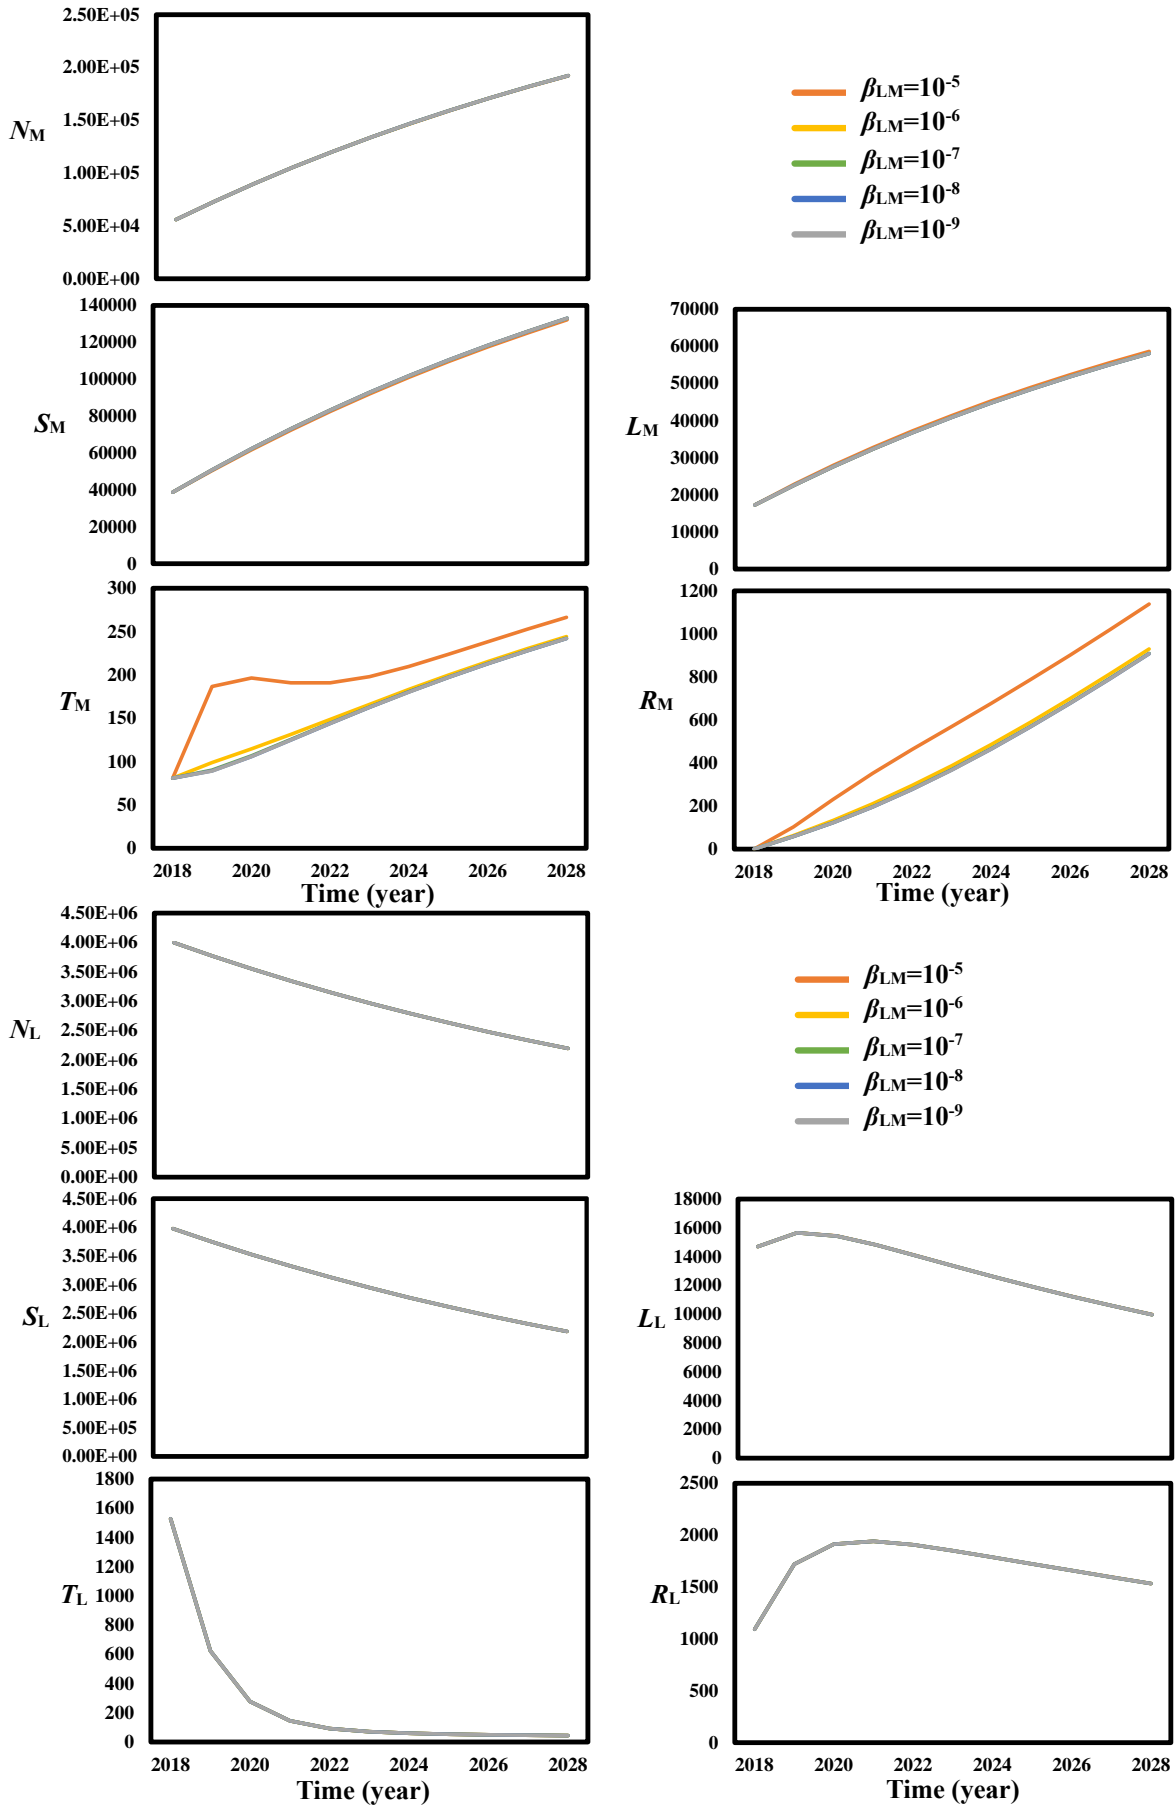

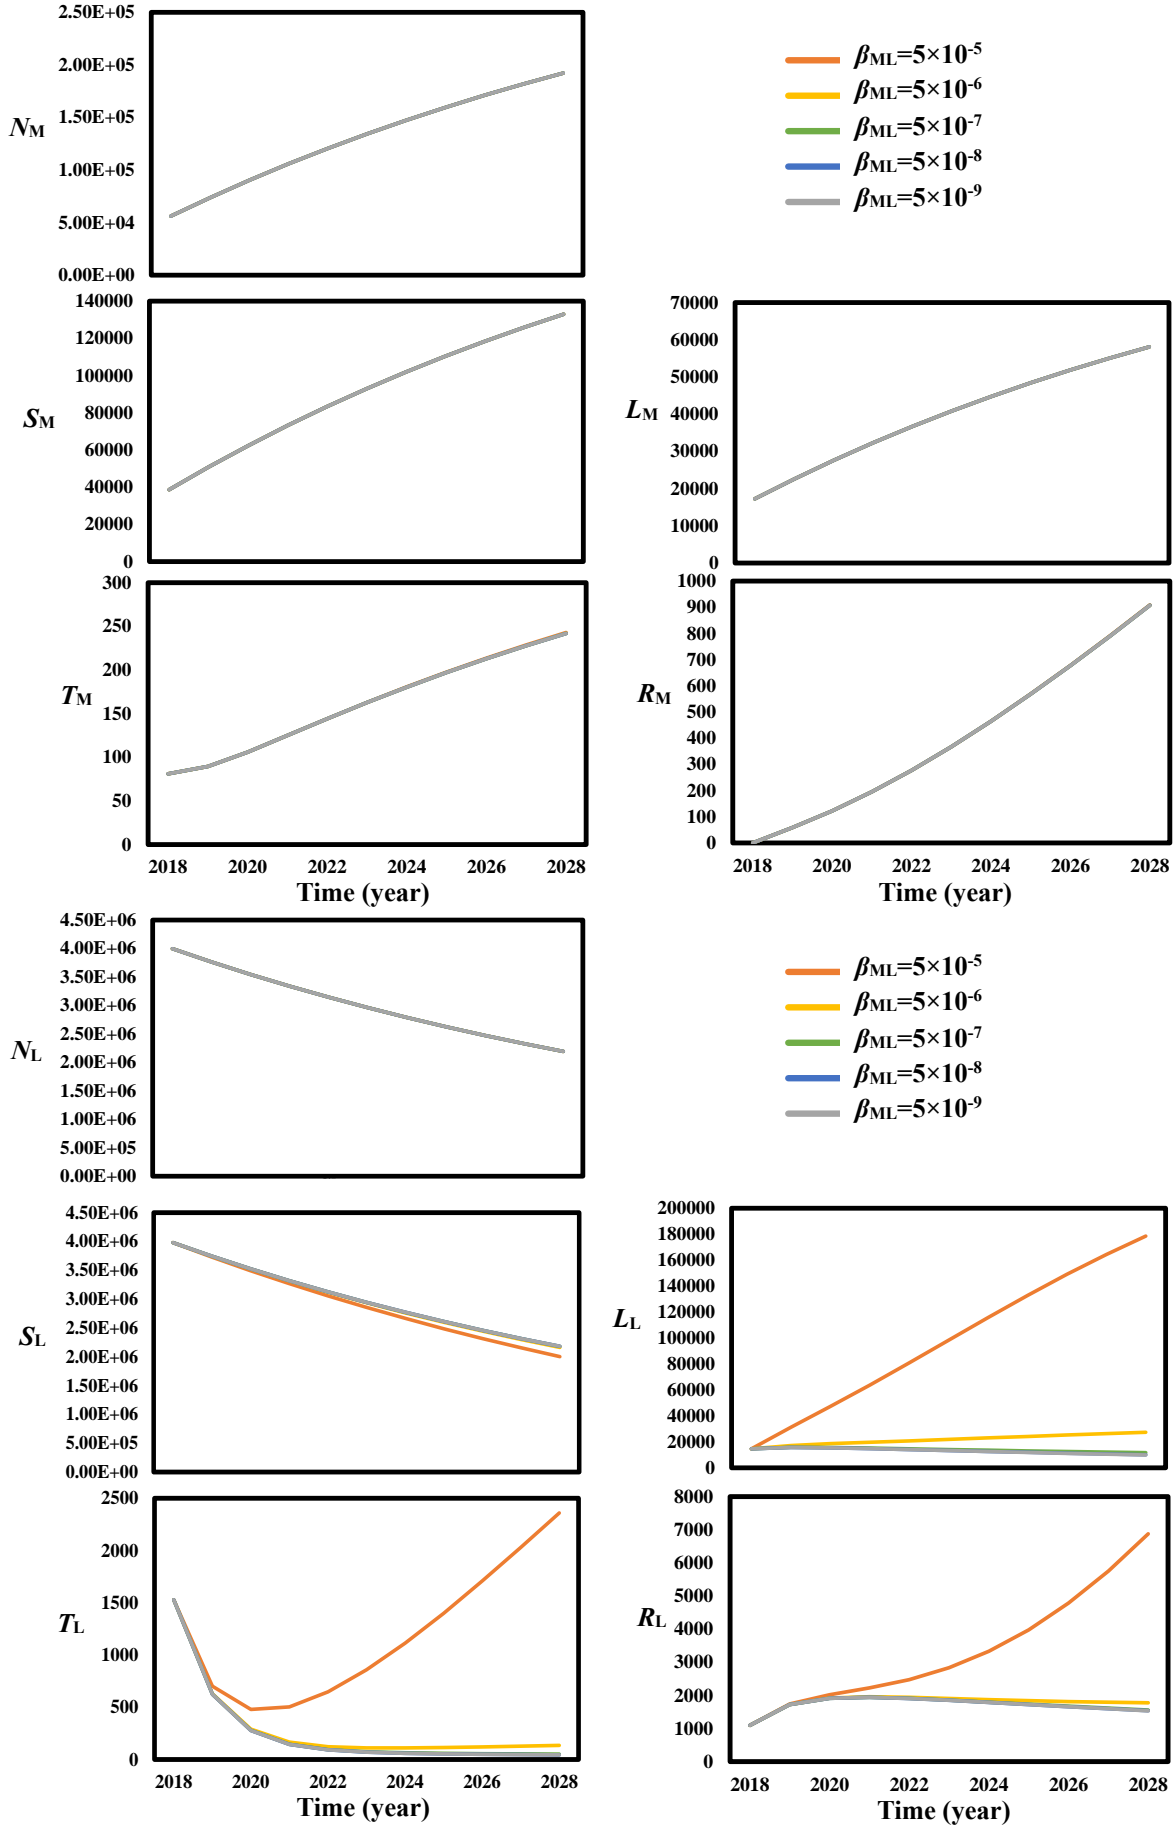



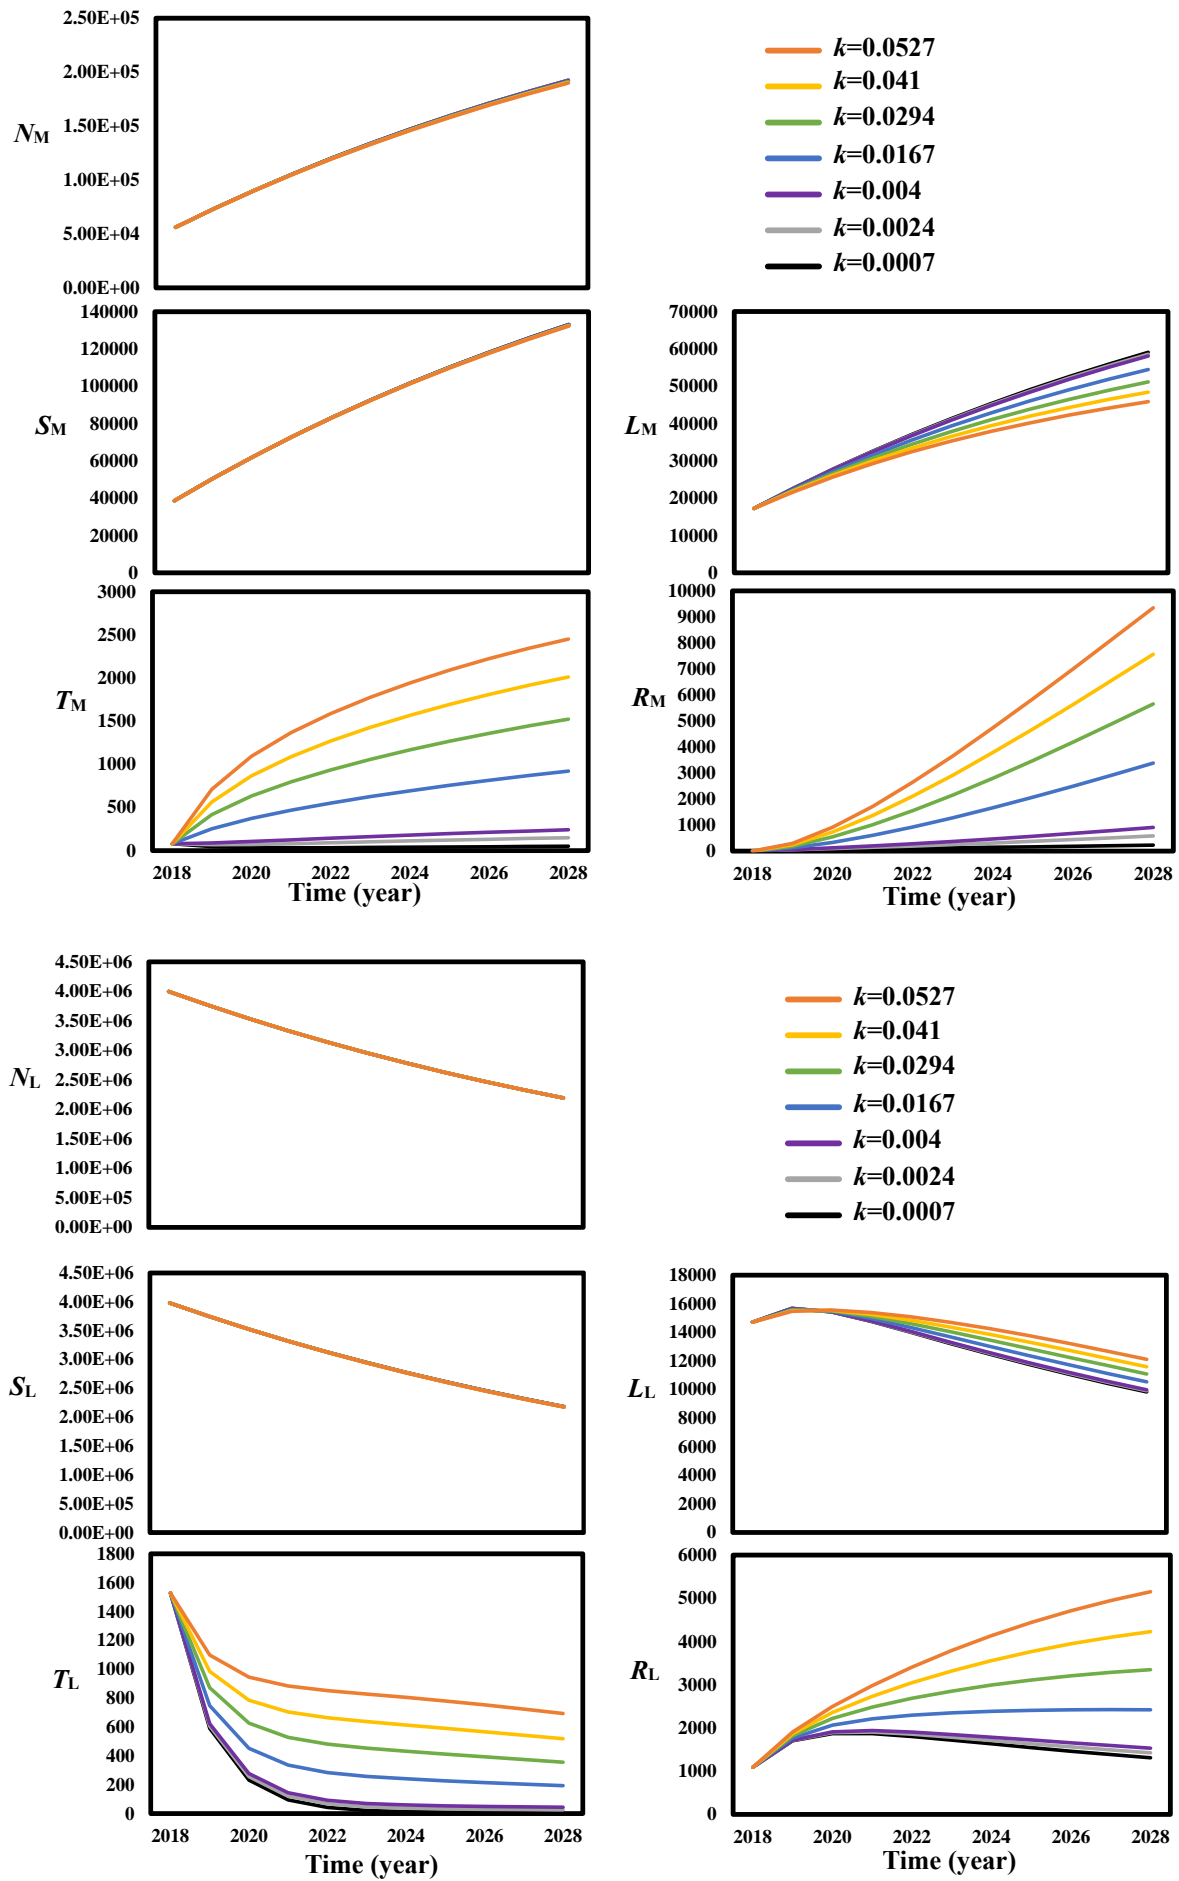

Supplement: s1 [file s1]
